1 Detection of race-specific resistance against *Puccinia coronata* f. sp. *avenae* in  
2 *Brachypodium* species

3

4 Vahid Omidvar, Sheshanka Dugyala, Feng Li, Susan Rottschaefer, Marisa E. Miller, Mick  
5 Ayliffe, Matthew J. Moscou, Shahryar F. Kianian, Melania Figueroa.

6

7 First, second, third, fourth, fifth, eighth and ninth authors: Plant Pathology, University of  
8 Minnesota, St. Paul, MN, USA; sixth author: CSIRO Agriculture and Food, ACT, Australia;  
9 seventh author: The Sainsbury Laboratory, Norwich Research Park, Norwich NR4 7UH,  
10 UK; eighth author: Cereal Disease Laboratory, United States Department of Agriculture-  
11 Agricultural Research Service, St. Paul, MN, USA; ninth author: Stakman-Borlaug Center  
12 for Sustainable Plant Health, University of Minnesota, St. Paul, MN, USA.

13

14

15

16

17 Correspondence: Melania Figueroa; email: [figue031@umn.edu](mailto:figue031@umn.edu); Tel: +1 612 624 2291

18

19

20

21

22

23

24

25

26

27

28

29

30

31

32 **Abstract**

33

34 Oat crown rust caused by *Puccinia coronata* f. sp. *avenae* is the most destructive foliar  
35 disease of cultivated oat. Characterization of genetic factors controlling resistance  
36 responses to *Puccinia coronata* f. sp. *avenae* in non-host species could provide new  
37 resources for developing disease protection strategies in oat. We examined symptom  
38 development and fungal colonization levels of a collection of *Brachypodium distachyon*  
39 and *B. hybridum* accessions infected with three North American *P. coronata* f. sp. *avenae*  
40 isolates. Our results demonstrated that colonization phenotypes are dependent on both  
41 host and pathogen genotypes, indicating a role for race-specific responses in these  
42 interactions. These responses were independent of the accumulation of reactive oxygen  
43 species. Expression analysis of several defense-related genes suggested that salicylic  
44 acid and ethylene-mediated signaling, but not jasmonic acid are components of  
45 resistance reaction to *P. coronata* f. sp. *avenae*. Our findings provide the basis to conduct  
46 a genetic inheritance study to examine if effector-triggered immunity contributes to non-  
47 host resistance to *P. coronata* f. sp. *avenae* in *Brachypodium* species.

48

49 **Keywords** non-host, oat, crown rust, resistance, susceptibility, effector

50

51 **Introduction**

52

53 Oat crown rust caused by the obligate biotrophic rust fungus *Puccinia coronata* f. sp.  
54 *avenae* is the most widespread and damaging foliar disease of cultivated oat (*Avena*  
55 *sativa* L.) (Nazareno et al. 2017). Symptoms of crown rust infection manifest in the foliar  
56 tissue, causing a reduction in photosynthetic capacity and thus affecting grain size and  
57 quality (Holland and Munkvold 2001; Simons 1985). The most sustainable method to  
58 control this devastating disease is the use of genetic resistance (Carson 2011). Novel  
59 sources of genetic resistance may therefore translate into novel crop protection  
60 strategies.

61

62 In general, plant disease resistance to would-be pathogens can be conferred by either  
63 constitutive or induced barriers (Heath 2000; Nurnberger and Lipka 2005). Physical  
64 barriers, such as rigid cell walls and waxy cuticles as well as preformed antimicrobial  
65 compounds are some of the constitutive obstacles that explain why plants are immune to  
66 most microbes. Nevertheless, certain microbes have evolved strategies to overcome  
67 these barriers, and in such instances plant-microbe incompatibility is based upon  
68 pathogen recognition and the induction of plant defense responses (Heath 2000,  
69 Periyannan et al. 2017).

70

71 Inducible defense responses in plants are mediated by a tightly regulated two-tier immune  
72 recognition system that, depending on the physiological characteristics of the potential  
73 pathogen, may or may not be effective at preventing microbial colonization (Dodds and

74 Rathjen 2010). The first layer of microbial recognition is controlled by cell surface  
75 associated receptors, named pattern recognition receptors (PRRs). PRRs recognize  
76 conserved and essential microbial molecules known as pathogen-associated molecular  
77 patterns (PAMPs) and/or plant derived damage-associated molecular patterns (DAMPs).  
78 This recognition leads to the activation of a range of broad-spectrum basal defenses that  
79 constitute PAMP-triggered immunity (PTI) (Zipfel 2008). PAMPs in pathogenic fungi like  
80 the crown rust pathogen include chitin or xylanases, which are essential constituents of  
81 the fungal cell wall. In contrast, DAMPs are not necessarily pathogen derived and include  
82 plant cell wall fragments and plant peptides released during infection.

83

84 Adapted pathogens manipulate PTI signaling events and suppress basal defenses by  
85 secreting a suite of effector proteins into plant cells, thereby enabling successful plant  
86 colonization in some instances (Toruno et al. 2016). However, disease resistance against  
87 adapted pathogens can still occur if the plant can recognize one or more of these secreted  
88 effector molecules. Effector recognition generally occurs by plant intracellular nucleotide  
89 binding leucine rich repeat (NB-LRR) receptors that each induce defense responses upon  
90 recognition of a cognate pathogen effector, also known as an avirulence (Avr) protein.  
91 This second layer of pathogen recognition, referred to as effector-triggered immunity  
92 (ETI), frequently results in a localized hypersensitive cell death response at attempted  
93 infection sites (HR) and is the underlying molecular basis of the gene-for-gene concept  
94 (Dodds and Rathjen 2010; Ellis et al. 2014; Flor 1971). ETI is highly specific with  
95 resistance only occurring if the adapted pathogen isolate expresses an effector that is  
96 recognized by a corresponding NB-LRR in the infected plant.

97

98 The delivery of rust effector proteins into host plants is mediated by distinct fungal  
99 infection structures called haustoria (Catanzariti et al. 2006; Garnica et al. 2014;  
100 Panstruga and Dodds 2009). Only a small number of effectors have been characterized  
101 in rust fungi (Chen et al. 2017; Maia et al. 2017; Ravensdale et al. 2011; Salcedo et al.  
102 2017), however, genome-wide effector mining suggests that rust pathogens may deploy  
103 hundreds of effector molecules via the haustorium during infection (Cantu et al. 2013;  
104 Duplessis et al. 2011; Hacquard et al. 2012; Nemri et al. 2014; Rutter et al. 2017). Oat  
105 crown rust populations are typified by a complex race-structure, which likely originates  
106 from variation in the array of effectors present in different pathogen genotypes (Carson  
107 2011; Chong et al. 2000; Nazareno et al. 2017). For years, oat breeding programs have  
108 relied upon naturally occurring resistance in *Avena* spp., most likely mediated by *NB-LRR*  
109 genes, to protect against crown rust. However, the resistance of these oat varieties is  
110 often rapidly overcome by evolution of the crown rust pathogen to avoid host plant  
111 recognition. Achieving increased durability in oat crown rust resistance therefore requires  
112 new sources of genetic immunity to be identified and further advances made in our  
113 understanding of the molecular basis of rust recognition in host and non-host plant  
114 species.

115

116 Non-host plant species potentially offer an untapped resistance resource. Non-host  
117 resistance (NHR) is typically described in the context of a dichotomy that distinguishes it  
118 from host resistance. NHR is defined as genotype-independent and effective against all  
119 genetic variants of a non-adapted pathogen species, whereas host resistance is

120 genotype-dependent and effective only against a subset of genetic variants of an adapted  
121 pathogen (Mysore and Ryu 2004). This paradigm has been gradually changing as  
122 accumulating evidence suggests that signaling pathways and defense mechanisms  
123 overlap in non-host and host resistance and that microbial adaptation to plant species  
124 does not conform to a simple qualitative distinction (Bettgenhaeuser et al. 2014; Dawson  
125 et al. 2015; Figueroa et al. 2015; Gill et al. 2015; Thordal-Christensen 2003). Instead,  
126 disease phenotypes observed for different plant and pathogen interactions span a  
127 continuous spectrum of outcomes ranging from immunity to susceptibility, with many  
128 intermediate interactions, making the classification of non-host versus host systems  
129 problematic (Bettgenhaeuser et al. 2014; Dawson et al. 2015). Regardless of the  
130 terminology, identifying the molecular determinants of non-host or intermediate  
131 resistance is of great interest as this type of resistance could be durable and broad-  
132 spectrum and contribute significantly to crop improvement.

133  
134 *Brachypodium distachyon*, a small grass closely related to cereals, is considered a non-  
135 host to several rust fungi species related to *P. coronata* f. sp. *avenae*, such as *Puccinia*  
136 *emaculata*, *Puccinia striiformis*, *Puccinia graminis* and *Puccinia triticina* (Ayliffe et al.  
137 2013; Barbieri et al. 2011; Bettgenhaeuser et al. 2014; Bossolini et al. 2007; Dawson et  
138 al. 2015; Figueroa et al. 2013, 2015; Gill et al. 2015). Variation in fungal colonization in  
139 some of these interactions suggests that it may be possible to genetically dissect these  
140 types of immune responses and harness them for engineering rust disease resistance  
141 (Figueroa et al. 2015). In this study, we examined the interaction between *P. coronata* f.  
142 sp. *avenae* and *B. distachyon*, as well as *Brachypodium hybridum*. *B. hybridum* is an

143 allotetraploid species originated from the hybridization of the diploid species *B. distachyon*  
144 and *B. stacei* (Lopez-Alvarez et al. 2012).

145  
146 Pathogen susceptibility in plants, particularly to rust fungi, is a process, which remains  
147 poorly characterized. Our study shows that *P. coronata* f. sp. *avenae* can infect *B.*  
148 *distachyon* and *B. hybridum* leaves and grow extensively, but cannot sporulate. These  
149 findings open the possibility of investigating mechanisms that confer partial rust  
150 susceptibility in *Brachypodium*. Gene expression analysis of an ortholog of the putative  
151 rust susceptibility factor in wheat, which encodes a hexose transporter (Moore et al.  
152 2015), suggested that sugar transport may also be important to sustain the growth of *P.*  
153 *coronata* f. sp. *avenae* in *B. distachyon*. In addition to this, we found evidence for race-  
154 specific resistance in both species supporting the model proposed by Schulze-Lefert and  
155 Panstruga (2011), which postulates a role of ETI in NHR due to the phylogenetic  
156 relatedness between the non-host and host species. These findings provide a framework  
157 to conduct genetic inheritance studies to dissect recognition of *P. coronata* f. sp. *avenae*  
158 by *B. distachyon* and *B. hybridum* and identify loci governing intermediate oat crown rust  
159 susceptibility.

160

## 161 **Materials and Methods**

162

### 163 **Plant and fungal materials**

164

165 Twenty-two accessions of *B. distachyon* (ABR6, ABR7, Adi12, Adi13, Adi15, Bd1-1,

166 Bd18-1, Bd21, Bd21-3, Bd2-3, Bd29-1, Bd30-1, Bd3-1, BdTR10H, BdTR13K, Foz1, J6.2,  
167 Jer1, Koz5, Luc1, Mon3, and Tek4) and three accessions of *B. hybridum* (Bou1, Bel1,  
168 and Pob1) were used in this study. Seeds were obtained from the John Innes Centre  
169 (Dawson et al. 2015), Aberystwyth University (Mur et al. 2011), Joint Genome Institute  
170 and Montana State University (Vogel et al. 2009), Universidad Politécnica de Madrid (Dr.  
171 Elena Benavente) and USDA-ARS Plant Science Unit, St. Paul, MN, U.S.A (Garvin et al.  
172 2008). All plants were increased by single seed descent prior to conducting this study.  
173 The cultivated oat (*Avena sativa*) variety Marvelous was used as a susceptible host to *P.*  
174 *coronata* f. sp. *avenae*. This study used three North American oat crown rust isolates,  
175 12NC29 (race LBBB) and 12SD80 (race STTG) (Miller et al. 2018) collected in 2012, and  
176 a historic race 203 (race QBQT) known to be avirulent to the oat variety Victoria (Chang  
177 and Sadanaga 1964). Isolates were obtained from the rust collection available at the  
178 USDA-ARS Cereal Disease Laboratory, St. Paul, MN, U.S.A., and physiological race  
179 analysis was conducted following a standard nomenclature system using a set of oat  
180 differentials (Chong et al. 2000; Nazareno et al. 2017). Reported race assignment  
181 conveys consistent results from three independent experiments. Virulence phenotypes of  
182 *P. coronata* f. sp. *avenae* isolates on oat differentials with infection types of “0”, “0;”, “;”,  
183 “;C”, “1;”, “1”, “2”, “3”, “3+”, and “4” were converted to a 0-9 numeric scale, respectively  
184 for heat map generation.

185

## 186 **Inoculation and pathogen assays**

187

188 *Brachypodium* and oat seedlings were grown with 18/6 h light/dark, 24/18°C day/night



189 cycles and 50% humidity. Urediniospores were activated by heat shock treatment at 45°C  
190 for 15 min to break cold induced dormancy and suspended in an oil carrier (Isopar M,  
191 ExxonMobil) for spray inoculation. Seedlings of *Brachypodium* accessions and oat were  
192 inoculated using 50 µL of each *P. coronata* f. sp. *avenae* inoculum (10 mg  
193 urediniospores/mL) at three-leaf and first-leaf stages, respectively. For mock inoculation,  
194 seedlings were sprayed with oil without urediniospores. Infected seedlings were placed  
195 in dew chambers in the dark for 12 h with intermittent misting for 2 min every 30 min. After  
196 12 h, misting was stopped and seedlings were exposed to light for 2 h before they were  
197 placed back in growth chambers. Infected primary leaves of oat and secondary leaves of  
198 *Brachypodium* accessions were collected for analysis. Presence (+) or absence (-) of  
199 macroscopic symptoms, including chlorosis and/or necrosis as well as severity of the  
200 symptoms (shown as increments of +) were evaluated at 14 days post infection (dpi) in  
201 two independent experiments (biological replicates). Each biological replicate  
202 simultaneously tested all accessions, and five plants were examined per accession. Each  
203 plant was considered a technical replicate within one independent experiment. Digital  
204 images were captured using a stereomicroscope (Olympus model SZX16). To examine  
205 correlations between necrosis or chlorosis and estimates of fungal colonization (mean  
206 values), symptoms described as “-”, “+”, “++”, “+++” and “++++” were transformed to  
207 numerical values 0-4, respectively, to calculate a Spearman’s rank correlation coefficient.

208

### 209 **Analysis of fungal colonization by microscopy**

210

211 Both infected secondary *Brachypodium* leaves at 14 dpi and infected primary *A. sativa*

212 (variety Marvelous) leaves at 12 dpi were cut into 1 cm length sections and stained with  
213 wheat germ agglutinin Alexa Fluor® 488 conjugate (WGA-FITC; ThermoFisher Scientific)  
214 to visualize fungal colonies as previously described (Ayliffe et al. 2013; Dawson et al.  
215 2015). Visualization of fungal intracellular growth was carried out using a fluorescence  
216 microscope (Leica model DMLB) under blue light with a 450-490 nm excitation filter. The  
217 percentage of leaf colonized (pCOL) by *P. coronata* f. sp. *avenae* was estimated  
218 according to the method of Dawson et al. (2015) with a modification to report 0, 0.5, 0.75,  
219 and 1 scores for disjointed fields of view with hyphal growth less than 15%, between 15-  
220 50%, 50-75%, and greater than 75%, respectively. Two independent experiments  
221 (biological replicates) were evaluated per *P. coronata* f. sp. *avenae* isolate (12SD80, 203,  
222 and 12NC29) and each biological replicate included three leaves. Each leaf was  
223 considered a technical replicate within one independent experiment. pCOL values from  
224 all three leaves were combined to obtain a mean and standard error of the mean. Fungal  
225 development was also examined in whole-mounted infected leaves of *B. distachyon*  
226 accessions ABR6 and Bd21 and oat at 1, 2, 3, and 6 dpi. The percentage of  
227 urediniospores that successfully germinated and formation of various infection structures,  
228 including appressorium (AP), substomatal vesicle (SV), haustorium-mother cell (HMC),  
229 and established colonies (EC), were recorded in WGA-FITC stained samples. Three  
230 independent experiments (biological replicates) were conducted and simultaneously  
231 evaluated infections with *P. coronata* f. sp. *avenae* isolates 12SD80, 203, and 12NC29.  
232 Each biological replicate recorded fungal development for 100 infection sites. Mean and  
233 standard error of the mean per infection structure category were calculated based on all  
234 three biological replicates.

## 235 **Analysis of H<sub>2</sub>O<sub>2</sub> accumulation**

236

237 H<sub>2</sub>O<sub>2</sub> accumulation was evaluated using 3,3'-diaminobenzidine (DAB) staining as  
238 described by Thordal-Christensen et al. (1997). Infected leaves were stained in 1 mg/mL  
239 DAB aqueous solution at pH 3.8 for 4 h in dark and destained in Farmer's fixative for 12  
240 h. Three independent experiments (biological replicates) were conducted. Each biological  
241 replicate included one to two infected secondary leaves to record the number of  
242 urediniospores from a 100 sample within a 500 µm distance to a DAB staining site at 2,  
243 4 and 6 dpi. The oat differential that contains the resistance gene *Pc91*, which confers  
244 resistance to rust isolates 12SD80 and 12NC29, was included as a positive experimental  
245 control for detection of H<sub>2</sub>O<sub>2</sub>. Three negative controls were used including an oat  
246 differential that contains the resistance gene *Pc14* which is not effective against 12SD80  
247 and 12NC29, oat variety Marvelous infected with 12SD80 and 12NC29 and mock  
248 inoculated Marvelous. Samples were examined using an upright light microscope (Nikon  
249 Eclipse 90i). Mean and standard error of the mean of the number of urediniospores  
250 associated with H<sub>2</sub>O<sub>2</sub> accumulation were calculated based on all three biological  
251 replicates. Digital micrographs were captured with a Nikon D2-Fi2 color camera using  
252 bright field and objective lens 4x and 10x. Multiple images were acquired in X, Y and Z  
253 planes using Z-series process using the Nikon Elements software. Z-stacking images  
254 were treated with an extended depth of focus (EDF) function to focus all the planes.

255

## 256 **qPCR quantification of fungal DNA**

257

258 Genomic DNA was extracted from infected and mock-treated secondary leaves of *B.*  
259 *distachyon* accessions ABR6 and Bd21 at 3, 7, and 12 dpi using DNeasy Plant Mini Kit  
260 (Qiagen). The relative abundance of fungal DNA was measured using the Femto™  
261 Fungal DNA Quantification Kit (Zymo Research) based on quantification of ITS regions  
262 using ITS-specific primers and fungal DNA Standards provided by the manufacturer. PCR  
263 was conducted using a CFX96 Real-Time system (Bio-Rad) and thermal cycles were set  
264 for initial denaturation at 95°C for 10 min, 45 cycles of 95°C for 30 s, 50°C for 30 s, 60°C  
265 for 60 s, followed by a final extension cycle at 72°C for 7 min. The *Brachypodium GAPDH*  
266 gene was also quantified in the same DNA samples using gene-specific primers (Hong  
267 et al. 2008). Fungal DNA level was normalized relative to the plant *GAPDH* value in each  
268 sample. Four independent experiments (biological replicates) were analyzed per time  
269 point per isolate, with two technical replicates within each biological replicate. Mean and  
270 standard error of the mean per condition (fungal isolate x *Brachypodium* accession x time  
271 point) were calculated based on data from all four experiments. Correlation between  
272 accumulation of fungal DNA, combined for all isolates at each time point (3, 7, and 12  
273 dpi) and estimates of fungal colonization, combined for all isolates at 14 dpi was  
274 determined using a Pearson's correlation coefficient test.

275

### 276 **RNA extraction and RT-qPCR analysis**

277

278 Total RNA was extracted from infected and mock-treated secondary leaves of *B.*  
279 *distachyon* accessions ABR6 and Bd21 at 12, 24, 48, and 72 hpi using the RNeasy Plant  
280 Mini Kit (Qiagen). For RT-qPCR, cDNA was synthesized using the PrimeScript First

281 Strand cDNA Synthesis Kit (Takara) and amplification was performed using the  
282 SensiFAST SYBR Lo-ROX Kit (Bioline). Sequences of gene-specific primers, reported by  
283 Gill et al. (2015) and Mandadi and Scholthof (2012) and those used in our study are listed  
284 in Supplementary Table 1. The *GAPDH*, *Ubi4* and *Ubi18* genes were examined as  
285 potential reference genes (Hong et al. 2008). Expression levels were normalized using  
286 the plant *GAPDH* gene after comparing PCR efficiencies and variation of quantification  
287 cycle (Cq) values for all three genes across time points in mock or pathogen-inoculated  
288 *Brachypodium* accessions (ABR6 and Bd21). PCR thermal cycles were set for initial  
289 denaturation at 95°C for 2 min, 40 cycles of 95°C for 5 s, followed by annealing/extension  
290 at 60°C for 20 s in a CFX96 Real-Time PCR system (Bio-Rad). Data was collected from  
291 three independent experiments (biological replicates) and each biological replicate  
292 included two technical replicates. Differential expression (DE) values were calculated as  
293 normalized fold changes of the expression using the  $\Delta\Delta CT$  method (Livak and Schmittgen  
294 2001), and DE value  $\geq 2$  was considered as a significant change in gene expression.

295

## 296 **Results**

297

### 298 **Variation in resistance response of *Brachypodium* accessions to *P. coronata* f. sp. 299 *avenae* infection**

300

301 To examine the ability of *P. coronata* f. sp. *avenae* to infect non-host species *B.*  
302 *distachyon* and *B. hybridum* we evaluated the disease responses of 25 different  
303 *Brachypodium* accessions to three North American *P. coronata* f. sp. *avenae* isolates,

304 12SD80, 203, and 12NC29. First we characterized the virulence phenotypes of these  
305 isolates using a set of oat differentials (Fig. 1A). All three isolates are fully virulent on the  
306 susceptible oat variety Marvelous with obvious sporulation occurring at 14 dpi (Fig 1B,  
307 C). In contrast, no pustules were observed on any *Brachypodium* accession 30 days post-  
308 infection, which suggests that the asexual phase of the *P. coronata* f. sp. *avenae* life cycle  
309 cannot be completed on either *B. distachyon* or *B. hybridum*. However, macroscopic  
310 symptoms were observed on *Brachypodium* accessions in response to challenge with  
311 these rust isolates (Fig. 1D, E, Table 1) with some accessions developing chlorosis and/or  
312 necrosis of varying severity (Fig. 1F, Table 1). These symptoms were dependent upon  
313 both the accession genotype and rust genotype. For example, the necrosis severity of  
314 accession Bd1-1 was high in response to isolate 12SD80 but low upon infection with  
315 isolates 203 and 12NC29, whereas chlorosis severity in accession Adi13 was higher  
316 when challenged with isolates 12SD80 and 12NC29 but lower in response to isolate 203.  
317 Some *Brachypodium* accessions, such as Bd2-3, Bd3-1 and Tek4, reacted differently to  
318 all three rust isolates with different necrosis and chlorosis severities observed in each  
319 interaction. ABR6 consistently showed minimal symptom development, whereas  
320 accessions such as Bd21, Bd21-3 and Koz5 displayed more extreme necrosis and  
321 chlorosis responses to all three isolates.

322

323 In parallel, all accessions were analyzed microscopically to determine the extent of *P.*  
324 *coronata* f. sp. *avenae* infection for each isolate. For all three isolates, urediniospores  
325 germinated to produce appressoria and penetrated the plant indicating that  
326 *Brachypodium* accessions are recognized as a potential host by *P. coronata* f. sp. *avenae*

327 (Supplementary Fig. 1). A large variation in rust growth was observed amongst these  
328 *Brachypodium* accessions (Fig. 2A) although growth was always less than that observed  
329 on the oat host. Microscopically no *P. coronata* f. sp. *avenae* isolate showed initiation of  
330 uredinia on any *Brachypodium* accession confirming the non-host status of *B. distachyon*  
331 and *B. hybridum* to this phytopathogen.

332

333 In general, *P. coronata* f. sp. *avenae* isolates 12SD80 and 203, which are more broadly  
334 virulent on the oat differentials (27 and 12, respectively) than isolate 12NC29 (5), showed  
335 more extensive growth on all tested *Brachypodium* accessions (Fig. 2A). Maximum  
336 colonization was greatest for isolate 12SD80, which colonized ~79% of the leaf area of  
337 accession Bd21-3, while isolate 203 colonized ~64% of the leaf area of accession Adi15.  
338 In contrast, the maximum colonization for isolate 12NC29 was ~41% of the leaf area of  
339 accession Koz5. For all three isolates, Koz5 and Bd21-3 were amongst those *B.*  
340 *distachyon* accessions with the greatest fungal growth, whereas *B. distachyon*  
341 accessions ABR6 and Foz1, as well as *B. hybridum* accession Pob1, had the least fungal  
342 growth.

343

344 The fungal growth of each isolate and accession combination was scored relative to the  
345 most fungal growth observed for each isolate (Supplementary Fig. 2). Interestingly, some  
346 accessions (i.e., Bd30-1, Bd3-1, BdTR10H) were substantially infected by isolates  
347 12SD80 and 203 while growth of 12NC29 was more restricted. In contrast, accession  
348 Tek4 was similarly infected by isolates 12SD80 and 12NC29, but had greater growth of  
349 203, while isolate 12SD80 grew more prolifically on accession Mon3 than did either

350 isolates 203 and 12NC29. Remarkably, we did not observe a correlation between the  
351 degree of necrosis and fungal colonization levels for each isolate ( $\rho=0.39-0.44$ ,  $p=0.03-$   
352  $0.05$ , Spearman's test). Weak correlations were found between chlorosis and colonization  
353 levels of 12SD80 ( $\rho=0.62$ ,  $p=1.37e-06$ ) and 203 ( $\rho=0.53$ ,  $p=0.0064$ ), in contrast to  
354 12NC29 ( $\rho=0.30$ ,  $p=0.15$ ). For example, Bd29-1 showed extensive necrosis and  
355 chlorosis when inoculated with isolate 12SD80 in contrast to 203, but had high levels of  
356 colonization by both isolates. Accession Bd18-1 developed the highest necrosis and  
357 chlorosis in response to 12NC29 but supported the lowest growth of this isolate. In  
358 contrast, the most obvious symptoms on Jer1 correlated with the greatest fungal growth,  
359 in this case by isolate 12SD80.

360

361 The variation in fungal growth occurring on different *Brachypodium* accessions suggests  
362 that it may be possible to dissect the genetic architecture controlling this NHR against *P.*  
363 *coronata* f. sp. *avenae*. Given the availability of an ABR6 x Bd21 F<sub>4:5</sub> *B. distachyon* family  
364 (Bettgenhaeuser et al. 2017) and the differences observed in *P. coronata* f. sp. *avenae*  
365 infection patterns (Fig. 2A), these two parental accessions were further analyzed. To  
366 further confirm the colonization values estimated for ABR6 and Bd21, fungal DNA  
367 accumulation was quantified by qPCR for each rust isolate over a time course experiment  
368 of 3, 7 and 12 dpi (Fig. 2B). Fungal DNA levels of each isolate increased in both  
369 accessions; however, statistical significant differences in the accumulation of DNA were  
370 observed between accessions at 7 and 12 dpi. Fungal DNA abundance was higher in  
371 accession Bd21 for all three isolates compared with ABR6, while isolate 12NC29 had the  
372 least growth on both accessions. A strong correlation was observed between levels of



373 fungal colonization of all three isolates in ABR6 and Bd21 and their fungal DNA  
374 abundance at 7 dpi ( $r=0.93$ ,  $p=0.0056$ , Pearson's test) and 12 dpi ( $r=0.91$ ,  $p=0.0098$ ),  
375 while the correlation was not significant at 3 dpi ( $r=0.76$ ,  $p=0.07$ ). These results validate  
376 fungal colonization estimates shown in Fig. 2A.

377

378 **Development of infection structures of *P. coronata* f. sp. *avenae* isolates on *B.***  
379 ***distachyon* ABR6 and Bd21**

380

381 The development of infection structures (Fig. 3A) of isolates 12SD80, 203, and 12NC29  
382 in a time course experiment (1, 2, 3, and 6 dpi) was compared between ABR6 and Bd21,  
383 with the susceptible oat variety Marvelous included as a positive control. Spore  
384 germination rates (GS) and appressorium development (AP) of all three rust isolates were  
385 similar on ABR6, Bd21 and oat (Fig. 3B). However, fungal growth on both *Brachypodium*  
386 accessions was significantly slower than on susceptible oat, with fewer substomatal  
387 vesicles (SV), haustorium-mother cells (HMC) and established colonies (EC) produced  
388 at 1, 2 and 3 dpi. The infection progression was generally slower on accession ABR6 than  
389 Bd21, while isolate 12SD80 grew at a faster rate on *B. distachyon* compared with the  
390 other two isolates, as demonstrated by the increased percentage of infection sites that  
391 formed SV in both accessions at 1 dpi. The most noticeable differences in the parental  
392 accessions ABR6 and Bd21 were related to the development of SV at 2 dpi with isolate  
393 12SD80 and HMC at 3 dpi for isolates 12SD80 and 203.

394

395 **Histological analysis of reactive oxygen species in *B. distachyon* ABR6 and Bd21**

396

397 The accumulation of H<sub>2</sub>O<sub>2</sub> in mesophyll cells was examined by DAB staining in  
398 accessions ABR6 and Bd21 upon infection with isolates 12SD80, 203, and 12NC29 at 2,  
399 4, and 6 dpi (Table 2, Supplementary Fig. 3). We conducted three independent  
400 experiments examining in each case 100 urediniospores from all three rust isolates. For  
401 isolate 12SD80 we found only a small number of urediniospores within 500 µm distance  
402 to DAB sites in ABR6 and Bd21, with slightly higher numbers of DAB sites in ABR6 than  
403 in Bd21 at 2 dpi and 4 dpi (Table 2). In contrast, DAB accumulation was rare in response  
404 to isolates 203 and 12NC29. We used an oat line carrying the *Pc91* gene, which confers  
405 resistance against 12SD80 and 12NC29 isolates (Fig. 1A), as a positive experimental  
406 control. In this case we observed a significantly greater proportion of urediniospores (~50-  
407 60%) from 12SD80 and 12NC29 in association with H<sub>2</sub>O<sub>2</sub> accumulation sites. The staining  
408 intensity and size of the H<sub>2</sub>O<sub>2</sub> accumulation sites were also greater in the positive control  
409 samples than those in ABR6 and Bd21 (Supplementary Fig. 3). The resistance gene  
410 *Pc14*, which is not effective against 12SD80 and 12NC29 isolates, susceptible oat  
411 Marvelous infected with 12SD80 and 12NC29 (Fig. 1A) and mock inoculated Marvelous  
412 were used as negative controls and did not result in accumulation of H<sub>2</sub>O<sub>2</sub> (Table 2,  
413 Supplementary Fig. 3). These data suggest that H<sub>2</sub>O<sub>2</sub> accumulation is not a common  
414 feature of *B. distachyon* NHR to *P. coronata* f. sp. *avenae*.

415

#### 416 **Transcript profiling of defense-related genes in *B. distachyon* ABR6 and Bd21**

417

418 To investigate the role of phytohormone-dependent defense responses in *Brachypodium*

419 upon *P. coronata* f. sp. *avenae* infection, the temporal expression profile of several  
420 defense-related genes involved in SA, ET, and JA signaling pathways, as well as genes  
421 involved in callose synthesis and the phenylpropanoid pathway, were examined. This  
422 analysis was undertaken for ABR6 and Bd21 during the early stages of infection (up to 3  
423 dpi), when there were not significant differences in fungal growth among isolates in both  
424 accessions (Fig. 2B). Three possible reference genes were evaluated for data  
425 normalization, *GAPDH*, *Ubi4* and *Ubi18* (Hong et al. 2008). qRT-PCR primers for the  
426 *GAPDH* gene showed the highest amplification efficiency (98.4%) when compared to  
427 primers for *Ubi4* (96%) and *Ubi18* (97.1%) (Supplementary Fig. 4A). The *GAPDH* gene  
428 was selected for data normalization as it displayed the least variation in expression (Cq  
429 values) when compared to *Ubi4* and *Ubi18* in mock and fungal infected tissues in both *B.*  
430 *distachyon* accessions and all time points together (Supplementary Fig. 4B). *GAPDH*  
431 displayed steady expression in mock and infected tissues across time points in each  
432 accession (Supplementary Fig. 4C) which further supported the suitability of this gene for  
433 data normalization. In general, expression of genes involved in the SA and ET signaling  
434 pathways were induced in ABR6 and Bd21 during the first 48 h post-infection; however,  
435 expression of JA biosynthesis genes was not altered (Fig. 4, Supplementary Fig. 5).  
436 Changes in gene expression were greater in ABR6 than Bd21 upon infection with isolates  
437 12SD80 and 203, but the inverse was observed for isolate 12NC29. These findings  
438 suggest differences between ABR6 and Bd21 in the early signaling responses to *P.*  
439 *coronata* f. sp. *avenae* infection.

440

441 Among the SA signaling pathway genes, expression of *Aberrant Growth Defects 2*

442 (*AGD2*) peaked at 24 to 48 hpi with isolates 12SD80, 203 and 12NC29. The highest  
443 upregulation of *AGD2* was observed in the interaction of 12SD80 and ABR6. Expression  
444 of *Alternative Oxidase (AOX1A)* was induced in ABR6 as early as 12 hpi with isolates  
445 12SD80 and 203, but it was not affected in response to isolate 12NC29. In contrast,  
446 *AOX1A* was upregulated in Bd21 only at 48 hpi in response to isolates 12SD80 and  
447 12NC29. The *Pathogenesis-related (PR)* genes *PR1* and *PR5* showed the greatest  
448 induction amongst all genes tested in response to all three crown rust isolates. The  
449 expression of both genes peaked at 48 hpi except for *PR5* expression after inoculation  
450 with 12NC29 which peaked at 24 hpi. Overall, induction of these SA-responsive genes  
451 occurred in all interactions, but were remarkably stronger in ABR6 when inoculated with  
452 12SD80 and 203, while Bd21 showed similar responses to all three isolates.

453  
454 Expression of *Ethylene Response Factor 1 (ERF1)* was maximal at 24 hpi with all three  
455 isolates and, as observed for SA-responsive genes, expression of *ERF1* was particularly  
456 high in ABR6 in response to isolates 12SD80 and 203. However, expression of an ET  
457 biosynthesis gene, *Aminocyclopropane-1-carboxylic Acid Oxidase (ACO1)*, two JA  
458 biosynthesis genes, *Lipoxygenase 2 (LOX2)*, and *12-oxophytodienoate Reductase 3*  
459 (*OPR3*), *WRKY18* transcription factor, and *callose synthase* did not change in either of  
460 the accessions in response to challenge with any of the three isolates (Supplementary  
461 Fig. 5). Expression of *Phenylalanine Ammonia-Lyase (PAL)* was only slightly induced in  
462 ABR6 at 12 hpi with isolate 12SD80. *Cinnamyl Alcohol Dehydrogenase (CAD)* reached  
463 maximum induction in both accessions at 24 to 48 hpi with isolates 12SD80 and 203. In  
464 response to infection with isolate 12NC29, this gene was only upregulated in Bd21

465 between 24 to 48 hpi.

466

### 467 **Transcript profiling of *BdSTP13* in *B. distachyon* ABR6 and Bd21**

468

469 The expression of the *Brachypodium* ortholog of *Lr67* (*STP13*) (Bradi1g69710) (Moore et  
470 al. 2015) was examined in accessions ABR6 and Bd21 upon infection with all three rust  
471 isolates, as it acts as a putative hexose transporter. *BdSTP13* was induced in both  
472 accessions in response to the tested rust isolates (Fig. 5). Gene induction peaked at 24  
473 to 48 hpi, except in the interaction between ABR6 and 12NC29, which showed low  
474 *BdSTP13* transcript accumulation.

475

### 476 **Discussion**

477

478 The lack of effective *P. coronata* f. sp. *avenae* resistance in oat coupled with rapid  
479 evolution of pathogen virulence necessitates a search for new sources of resistance to  
480 control oat crown rust disease. To explore the potential of using *Brachypodium* species  
481 as a germplasm resource for disease resistance against *P. coronata* f. sp. *avenae*, we  
482 have characterized the interaction between three *P. coronata* f. sp. *avenae* isolates and  
483 a panel of *Brachypodium* accessions, including *B. distachyon* and *B. hybridum*. At the  
484 macroscopic level, variation in resistance phenotypes was observed, which has been  
485 previously reported for other rust interactions with *B. distachyon*. In these studies, *P.*  
486 *striiformis*, *P. graminis*, and *P. triticina* infection phenotypes varied from immunity to a  
487 range of symptoms that included pustule formation and sporulation (Ayliffe et al. 2013;

488 Figueroa et al. 2013; Garvin 2011). However, similar to *Brachypodium-P. emaculata*  
489 (switchgrass rust) interactions (Gill et al. 2015), we did not observe *P. coronata* f. sp.  
490 *avenae* sporulation on any *Brachypodium* accession, which supports the status of *B.*  
491 *distachyon* and *B. hybridum* as non-hosts for this pathogen. Macroscopic infection  
492 symptoms were often associated with chlorosis and/or necrosis; however, it was visually  
493 difficult to confirm if these symptoms were a consequence of *P. coronata* f. sp. *avenae*  
494 infection. Microscopic analysis showed that *P. coronata* f. sp. *avenae* isolates 12SD80,  
495 203, and 12NC29 overcame pre-haustorial resistance defenses and were able to colonize  
496 leaves of all *Brachypodium* accessions tested. These results are similar to the interactions  
497 observed between *P. graminis* f. sp. *tritici* and *B. distachyon* (Ayliffe et al. 2013). In light  
498 of these observations, we would like to emphasize that our definition of *B. distachyon* and  
499 *B. hybridum* as non-hosts is based on previous established terminology, which uses  
500 absence of sporulation as indicator of resistance. However, given that both species  
501 tolerate growth of *P. coronata* f. sp. *avenae*, both *B. distachyon* and *B. hybridum* could  
502 be considered as non-native hosts, and previous observations reflect also variations in  
503 susceptibility. Furthermore, changes in growth conditions may favor sporulation of *P.*  
504 *coronata* f. sp. *avenae* in both *B. distachyon* and *B. hybridum*.

505  
506 To better understand the phenotypic variation existing between *P. coronata* f. sp. *avenae*  
507 and *Brachypodium* interactions, we compared the extent of fungal growth on a range of  
508 accessions. The rust isolates included in this study represent three distinct physiological  
509 races (genotypes). A wide range of pathogen growth was observed on different  
510 *Brachypodium* accessions and was dependent on both plant and fungal genotypes. Some

511 *Brachypodium* accessions tolerated more fungal growth when infected with isolates  
512 12SD80 and 203 versus 12NC29 (i.e., Bd30-1, Bd3-1, BdTR10H) (Fig. 2, Supplementary  
513 Fig. 2). Interestingly, we also identified accessions (i.e., Tek4) that tolerated more growth  
514 of isolates 12SD80 and 12NC29 than 203. These findings could be explained either by  
515 the lack of a plant target for pathogen effectors to promote infection effectively or the  
516 presence of race-specific components to resistance. The latter scenario implies that  
517 resistance is likely governed by variation in effector repertoires of the rust isolates and *R*  
518 genes present in the *Brachypodium* accessions. Given the close evolutionary relationship  
519 between oat and *Brachypodium* spp., it is possible that the accessions included in our  
520 study carry *R* genes that can detect effectors of *P. coronata* f. sp. *avenae*. Isolates  
521 12SD80 and 12NC29 display different virulence profiles on the oat differential set and the  
522 recent sequencing of these isolates provides evidence of extensive differences in effector  
523 gene complements of 12SD80 and 12NC29 (Miller et al. 2018). Future studies identifying  
524 and comparing the effector repertoires of rust species, including those in our study and  
525 others that infect *Brachypodium* (i.e., *Puccinia brachypodii*) may help to explain our  
526 findings.

527

528 The precise contribution of ETI to non-host rust resistance in *Brachypodium* remains  
529 elusive. Future efforts to dissect the genetic factors controlling resistance to *P. coronata*  
530 f. sp. *avenae* in *B. distachyon* will help to evaluate the model proposed by Schulze-Lefert  
531 and Panstruga (2011), in which ETI is the major contributor to NHR in plant species that  
532 are closely related to the natural host. Heterologous expression of fungal and bacterial  
533 effectors in several non-host pathosystems supports that effector recognition by

534 immunoreceptors contributes to resistance (Adlung et al. 2016; Giesbers et al. 2017; Lee  
535 et al. 2014; Stassen et al. 2013; Sumit et al. 2012), although in some cases effector  
536 recognition can occur in the absence of resistance (Giesbers et al. 2017; Goritschnig et  
537 al. 2012). Close examination of *Brachypodium* interactions with *P. graminis* ff. spp. *tritici*,  
538 *avena* and *phalaridis*, *P. triticina*, and *P. striiformis* suggests that HR-induced cell death  
539 is rare (Ayliffe et al. 2013). However, the lack of HR in these interactions does not  
540 necessarily undermine the contribution of ETI to non-host resistance, as there are  
541 instances when *R* gene-mediated ETI (e.g., wheat stem rust resistance gene, *Sr33*) can  
542 result in resistance without cell death (Periyannan et al. 2013). Further studies are needed  
543 to better understand the extent of ETI and HR contributions in NHR given that molecular  
544 and genetic factors in these interactions could be pathosystem-specific.

545  
546 To investigate the role of ROS in *B. distachyon* response to *P. coronata* f. sp. *avenae*, we  
547 examined accumulation of ROS in accessions ABR6 and Bd21, which display contrasting  
548 infection phenotypes. We found a small number of urediniospores from 12SD80  
549 associated with ROS accumulation, while detection of ROS was rare for other two  
550 isolates. However in these cases the accumulation of ROS in ABR6 and Bd21 was  
551 substantially less than that detected in a resistant oat line carrying the resistance gene  
552 *Pc91* (Table 2). These findings make the involvement of this ROS unlikely in the  
553 resistance of *Brachypodium* to *P. coronata* f. sp. *avenae*. In contrast to H<sub>2</sub>O<sub>2</sub>,  
554 phytohormones may play a thus far undefined role in modulating NHR in *Brachypodium*  
555 to rust pathogens.

556



557 Plant responses to pathogens are partly regulated through a complex interplay between  
558 salicylic acid (SA), ethylene (ET) and jasmonic acid (JA) signaling pathways (Denancé et  
559 al. 2013). Gill et al. (2015) found that several defense-related genes involved in SA, ET,  
560 and JA signaling pathways were induced in *Brachypodium* accessions infected with *P.*  
561 *emaculata*. In our study, upregulation of several SA-responsive genes and the key  
562 ethylene response regulator *ERF1* was detected, suggesting that SA and ET-signaling  
563 pathways may positively regulate NHR against *P. coronata* f. sp. *avenae*. The  
564 *Pathogenesis-related (PR)* genes *PR1* and *PR5* were upregulated in response to all rust  
565 isolates and given that *PR1* is a key marker gene of SA signaling (Kouzai et al. 2016;  
566 Sels et al. 2008), this further supports that the activation of SA-dependent defense  
567 responses may contribute to the phenotypes observed in *B. distachyon* and *B. hybridum*  
568 during *P. coronata* f. sp. *avenae* infection. JA biosynthesis genes were not induced,  
569 making this hormone unlikely to play an active role in this NHR response. In contrast,  
570 *ERF1*, which acts as a key regulatory element in the ET/JA-dependent defense  
571 responses, was upregulated suggesting that ET-responsive genes may enhance NHR  
572 (Berrocal-Lobo et al. 2002; Lorenzo et al. 2003; Müller and Munné-Bosch 2015).  
573 *Phenylalanine Ammonia-Lyase (PAL)* is a key enzyme in biosynthesis of polyphenolic  
574 compounds and lignin precursors and is often associated with host resistance responses  
575 against pathogens (Kalisz et al. 2015). Lignin deposition in response to pathogen attack  
576 is usually correlated with reinforcement of the cell wall and enhanced resistance (Miedes  
577 et al. 2014). Upregulation of *PAL* does not appear to play a significant role in the  
578 responses of *B. distachyon* to *P. coronata* f. sp. *avenae*; however, induction of *CAD* may  
579 point to cell wall alterations in response to isolates 12SD80 and 203. A genome-wide

580 transcriptional analysis of the interaction of *P. coronata* f. sp. *avenae* with ABR6 and Bd21  
581 will help to elucidate the involvement of some of these specific processes in NHR,  
582 including phytohormone regulation.

583

584 Extensive *P. coronata* f. sp. *avenae* growth in some *Brachypodium* accessions implies  
585 that the pathogen is capable of nutrient accession for a period of time and possibly able  
586 to target susceptibility factors conserved between *Brachypodium* and oat. Little is known  
587 about the mechanisms underlying rust susceptibility. Pathogens can alter sugar  
588 partitioning in the host to accommodate their growth (Lapin and Van den Ackerveken  
589 2013), and thus sugar transporter proteins (STPs) may be targeted by rust fungi to  
590 increase nutrient availability (Dodds and Lagudah 2016). The wheat *STP13* hexose  
591 transporter is implicated in supporting rust pathogens as mutations in this gene leads to  
592 broad-spectrum resistance (Moore et al. 2015). We examined the expression of the  
593 ortholog of wheat *STP13* in *Brachypodium* during infection by *P. coronata* f. sp. *avenae*.  
594 Interestingly, the highest levels of *BdSTP13* expression were obtained in accession Bd21,  
595 which is subjected to more rust growth than ABR6, suggesting that the gene may indeed  
596 serve as a susceptibility factor. Our results are consistent with previous findings that show  
597 that expression of *Lr67*, and its homoeologs in wheat peaks at 24 hpi upon infection with  
598 the leaf rust fungus, *Puccinia triticina*. Gene expression analysis of *Lr67* as well as other  
599 *STP13* genes in *Arabidopsis* and grapevine, indicates that the gene is also induced in  
600 response to pathogens (Hayes et al. 2010; Lemonnier et al. 2014; Moore et al. 2015).  
601 These observations provide a basis to study the contribution of sugar transport to rust  
602 susceptibility in an experimental system that is not as complex as in hexaploid oat and

603 wheat.

604

605 Several studies have demonstrated the value of mining wild relatives of crop species to  
606 introduce disease resistance. Effective race-specific rust resistance has been  
607 introgressed into wheat (*Triticum aestivum*) from related species, such as the *Sr50* gene  
608 from rye (*Secale cereale*), which confers resistance to wheat stem rust by recognition of  
609 the corresponding AvrSr50 effector of *P. graminis* f. sp. *tritici* (Chen et al. 2017; Mago et  
610 al. 2015). Similarly, functional transfer of the pigeonpea (*Cajanus cajan*) *CcRpp1*  
611 resistance gene into soybean confers resistance against soybean rust (*Phakopsora*  
612 *pachyrhizi*), which demonstrates how heterologous resistance transgenes can be used  
613 for crop improvement (Kawashima et al. 2016). This interspecies transfer of disease  
614 resistance highlights the possibility that *Brachypodium* genes that confer NHR to *P.*  
615 *coronata* f. sp. *avenae* could potentially be transferred to oat and provide disease  
616 resistance. As a next step, we are utilizing an ABR6 x Bd21 mapping population to identify  
617 resistance loci that could be tested in *A. sativa*. Both accumulation of fungal DNA and  
618 analysis of development of fungal infection structures (i.e., SV or HCM) can be used to  
619 phenotype the ABR6 x Bd21 mapping population. In summary, our findings indicate that  
620 *Brachypodium* is a suitable species for evaluating NHR to *P. coronata* f. sp. *avenae* and  
621 is a potential source of novel disease resistance for oat. The rapid expansion of genomic  
622 resources, including fully sequenced genomes and assessment of genetic diversity  
623 among *Brachypodium* genotypes (International *Brachypodium* Initiative 2010; Gordon et  
624 al. 2014, 2017) enables this species to be exploited for engineering disease resistance in  
625 closely related crop species.

626

627 **Acknowledgements**

628

629 We acknowledge support by the University of Minnesota Experimental Station USDA-  
630 NIFA Hatch/Figueroa project MIN-22-058, as well as the USDA-ARS-The University of  
631 Minnesota Standard Cooperative Agreement (3002-11031-00053115) between S.F.K  
632 and M.F. M.J.M. is supported by the Gatsby Foundation and Biotechnology and Biological  
633 Sciences Research Council (BB/P012574/1). We thank P.N. Dodds and E. Henningsen  
634 for discussions and comments during manuscript preparation, as well as Roger Caspers  
635 and Lief van Lierop for technical support. We would like to acknowledge the University  
636 Imaging Centers (UIC) (<http://uic.umn.edu>) and staff support at the University of  
637 Minnesota for using microscopy equipment.

638 **Literature cited**

639

640 Adlung, N., Prochaska, H., Thieme, S., Banik, A., Blüher, D., John, P., et al. 2016. Non-  
641 host resistance induced by the *Xanthomonas* effector XopQ is widespread within the  
642 genus *Nicotiana* and functionally depends on EDS1. *Front. Plant Sci.* 7.

643

644 Ayliffe, M., Singh, D., Park, R., Moscou, M.J., and Pryor, T. 2013. The infection of  
645 *Brachypodium distachyon* with selected grass rust pathogens. *Mol. Plant Microbe*  
646 *Interact.* 26:946-957.

647

648 Barbieri, M., Marcel, T.C., and Nicks, R.E. 2011. Host status of false brome grass to the  
649 leaf rust fungus *Puccinia brachypodii* and the stripe rust fungus *P. striiformis*. *Plant Dis.*  
650 95:1339-1345.

651

652 Berrocal-Lobo, M., Molina, A., and Solano, R. 2002. Constitutive expression of  
653 ETHYLENE-RESPONSE-FACTOR1 in *Arabidopsis* confers resistance to several  
654 necrotrophic fungi. *Plant J.* 29:23-32.

655

656 Bettgenhaeuser, J., Gilbert, B., Ayliffe, M., and Moscou, M. J. 2014. Nonhost resistance  
657 to rust pathogens—a continuation of continua. *Front. Plant Sci.* 5:664.

658

659 Bettgenhaeuser J, Corke, F.M.K., Opanowicz, M., Green, P., Hernández-Pinzón, I.,  
660 Doonan, J.H., et al. 2017. Natural variation in *Brachypodium* links vernalization and

661 flowering time loci as major flowering determinants. *Plant Physiol.* 173:256-268.

662

663 Bossolini, E., Wicker, T., Knobel, P. A., and Keller, B. 2007. Comparison of orthologous  
664 loci from small grass genomes *Brachypodium* and rice: implications for wheat genomics  
665 and grass genome annotation. *Plant J.* 49:704-717.

666

667 Cantu, D., Segovia, V., MacLean, D., Bayles, R., Chen, X., Kamoun, S., et al. 2013.  
668 Genome analyses of the wheat yellow (stripe) rust pathogen *Puccinia striiformis* f. sp.  
669 *tritici* reveal polymorphic and haustorial expressed secreted proteins as candidate  
670 effectors. *BMC Genomics* 14:270.

671

672 Carson, M.L. 2011. Virulence in oat crown rust (*Puccinia coronata* F. sp. *avenae*) in the  
673 United States from 2006 through 2009. *Plant Dis.* 95:1528-1534.

674

675 Catanzariti, A.M., Dodds, P.N., Lawrence, G.J., Ayliffe, M.A., and Ellis, J.G. 2006.  
676 Haustorially expressed secreted proteins from flax rust are highly enriched for avirulence  
677 elicitors. *Plant Cell* 18:243-256.

678

679 Chang, T.D., and Sadmaga, K. 1964. Crosses of six rnonosomics in *Avena sativa* L. with  
680 varieties, species and chlorophyll mutants. *Crop Sci.* 4: 589-593.

681

682 Chen, J., Upadhyaya, N.M., Ortiz, D., Sperschneider, J., Li, F., Bouton, C., et al. 2017.  
683 Loss of *AvrSr50* by somatic exchange in stem rust leads to virulence for *Sr50* resistance

684 in wheat. *Science* 358:1607-1610.

685

686 Chong, J., Leonard, K.J., and Salmeron, J.J. 2000. A North American system of  
687 nomenclature for *Puccinia coronata* f.sp. *avenae*. *Plant Dis.* 84:580-585.

688

689 Dawson, A.M., Bettgenhaeuser, J., Gardiner, M., Green, P., Hernández-Pinzón, I.,  
690 Hubbard, A., et al. 2015. The development of quick, robust, quantitative phenotypic  
691 assays for describing the host-nonhost landscape to stripe rust. *Front. Plant Sci.* 6:876.

692

693 Denancé, N., Sánchez-Vallet, A., Goffner, D., and Molina, A. 2013. Disease resistance or  
694 growth: the role of plant hormones in balancing immune responses and fitness costs.

695 *Front. Plant Sci.* 4:155.

696

697 Dodds, P.N., and Rathjen, J.P. 2010. Plant immunity: towards an integrated view of plant-  
698 pathogen interactions. *Nat. Rev. Genet.* 11:539-548.

699

700 Dodds, P.N., and Lagudah, E.S. 2016. Starving the enemy. *Science.* 354:1377-1379.

701

702 Duplessis, S., Cuomob, C.A., Linc, Y.C., Aertsd, A., Tisseranta, E., Veneault-Fourreya,  
703 C., et al. 2011. Obligate biotrophy features unraveled by the genomic analysis of rust  
704 fungi. *Proc. Natl. Acad. Sci. U.S.A.* 108:9166-9171.

705

706 Ellis, J.G., Lagudah, E.S., Spielmeier, W., and Dodds, P.N. 2014. The past, present and

707 future of breeding rust resistant wheat. *Front. Plant Sci.* 5:641.

708

709 Figueroa, M., Alderman, S., Garvin, D.F., and Pfender, W.F. 2013. Infection of  
710 *Brachypodium distachyon* by formae speciales of *Puccinia graminis*: Early infection  
711 events and host-pathogen incompatibility. *PLoS One* 8:e56857.

712

713 Figueroa, M., Castell-Miller, C.V., Li, F., Hulbert, S.H., and Bradeen, J.M. 2015. Pushing  
714 the boundaries of resistance: insights from *Brachypodium*-rust interactions. *Front. Plant*  
715 *Sci.* doi.org/10.3389/fpls.2015.00558.

716

717 Flor, H. 1971. Current status of the gene-for-gene concept. *Annu. Rev. Phytopathol.*  
718 9:275-296.

719

720 Garnica, D.P., Nemri, A., Upadhyaya, N.M., Rathjen, J.P., and Dodds, P.N. 2014. The ins  
721 and outs of rust haustoria. *PLoS Pathog.* 10:e1004329.

722

723 Garvin, D.F., Gu, Y.Q., Hasterok, R., Hazen, S.P., Jenkins, G., Mockler, T.C., et al.  
724 2008. Development of genetic and genomic research resources for *Brachypodium*  
725 *distachyon*, a new model system for grass crop research. *Crop Sci.* 48:S69-S84.

726

727 Garvin, D.F. 2011. Investigating rust resistance with the model grass *Brachypodium*, in  
728 *Proceedings of the 2011 Borlaug Global Rust Initiative Technical Workshop*, June 13–19,  
729 ed. R. McIntosh (St. Paul, MN), 89-91.



730

731 Giesbers, A.K.J., Pelgrom, A.J.E., Visser, R.G.F., Niks, R.E., Van den Ackerveken, G.,  
732 and Jeuken, M.J.W. 2017. Effector-mediated discovery of a novel resistance gene against  
733 *Bremia lactucae* in a nonhost lettuce species. *New Phytol.* 216:915–926

734

735 Gill, U.S., Uppalapati, S.R., Nakashima, J., and Mysore, K.S. 2015. Characterization of  
736 *Brachypodium distachyon* as a nonhost model against switchgrass rust pathogen  
737 *Puccinia emaculata*. *BMC Plant Biol.* 15:113.

738

739 Gordon, S.P., Priest, H., Des Marais, D.L., Schackwitz, W., Figueroa, M., Martin, J., et al.  
740 2014. Genome diversity in *Brachypodium distachyon*: Deep sequencing of highly diverse  
741 inbred lines. *Plant J.* 79:361-374.

742

743 Gordon, S.P., Contreras-Moreira, B., Woods, D.P., Des Marais, D.L., Burgess, D., Shu,  
744 S., et al. 2017. Extensive gene content variation in the *Brachypodium distachyon* pan-  
745 genome correlates with population structure. *Nat. Commun.* 8:2184.

746

747 Goritschnig, S., Krasileva, K.V., Dahlbeck, D., and Staskawicz, B.J. 2012. Computational  
748 prediction and molecular characterization of an oomycete effector and the cognate  
749 *Arabidopsis* resistance gene. *PLoS Genet* 8: e1002502.

750

751 Hacquard, S., Joly, D.L., Lin, Y.C., Tisserant, E., Feau, N., Delaruelle C., et al. 2012. A  
752 comprehensive analysis of genes encoding small secreted proteins identifies candidate

753 effectors in *Melampsora larici-populina* (Poplar Leaf Rust). *Mol. Plant Microbe Interact.*  
754 25:279-293.

755

756 Hayes, M.A., Feechan, A., and Dry, I.B. 2010. Involvement of abscisic acid in the  
757 coordinated regulation of a stress-inducible hexose transporter (VvHT5) and a cell wall  
758 invertase in grapevine in response to biotrophic fungal infection. *Plant Physiol.* 153:211-  
759 221.

760

761 Heath, M.C. 2000. Nonhost resistance and nonspecific plant defenses. *Curr. Opin. Plant*  
762 *Biol.* 3:315-319.

763

764 Holland, J.B., and Munkvold, G.P. 2001. Genetic relationships of crown rust resistance,  
765 grain yield, test weight, and seed weight in oat. *Crop Sci.* 41:1041-1050.

766

767 Hong, S.Y., Seo, P.J., Yang, M.S., Xiang, F., and Park, C.M. 2008. Exploring valid  
768 reference genes for gene expression studies in *Brachypodium distachyon* by real-time  
769 PCR. *BMC plant biol.* 8:112.

770

771

772 Kalisz, S., Oszmiański, J., and Wojdyło, A., 2015. Increased content of phenolic  
773 compounds in pear leaves after infection by the pear rust pathogen. *Physiol. Mol. Plant*  
774 *Pathol.* 91:113-119.

775

776 Kawashima, C.G., Guimaraes, G.A., Nogueira, S.R., MacLean, D., Cook, D.R.,  
777 Steuernagel, B., et al. 2016. A pigeonpea gene confers resistance to Asian soybean rust  
778 in soybean. *Nat. Biotechnol.* 34:661-665.

779  
780 Kouzai, Y., Kimura, M., Yamanaka, Y., Watanabe, M., Matsui, H., and Yamamoto, M.  
781 2016. Expression profiling of marker genes responsive to the defense-associated  
782 phytohormones salicylic acid, jasmonic acid and ethylene in *Brachypodium distachyon*.  
783 *BMC Plant Biol.* 16:59.

784  
785 Lapin, D., and Van den Ackerveken, G. 2013. Susceptibility to plant disease: More than  
786 a failure of host immunity. *Trends Plant Sci.* 18:546-554.

787  
788 Lee, H. A., Kim, S. Y., Oh, S. K., Yeom, S. I., Kim, S. B., Kim, M. S., et al. 2014. Multiple  
789 recognition of RXLR effectors is associated with nonhost resistance of pepper against  
790 *Phytophthora infestans*. *New Phytol.* 203:926-938.

791  
792 Lemonnier, P., Gaillard, C., Veillet, F., Verbeke, J., Lemoine, R., Coutos-Thévenot, P.,  
793 et al. 2014. Expression of Arabidopsis sugar transport protein STP13 differentially affects  
794 glucose transport activity and basal resistance to *Botrytis cinerea*. *Plant Mol. Biol.* 85:473-  
795 484.

796  
797 Livak, K.J., and Schmittgen, T.D. 2001. Analysis of relative gene expression data using  
798 real-time quantitative PCR and the 2(-Delta Delta C(T)). *Methods.* 25:402-408.

799

800 Lopez-Alvarez, D., Lopez-Herranz, M.L., Betekhtin, A., and Catalan, P. 2012. A DNA  
801 barcoding method to discriminate between the model plant *Brachypodium distachyon* and  
802 its close relatives *B. stacei* and *B. hybridum* (Poaceae). PLoS One 7:e51058.

803

804 Lorenzo, O., Piqueras, R., Sánchez-Serrano, J.J., and Solano, R. 2003. ETHYLENE  
805 RESPONSE FACTOR1 Integrates Signals from Ethylene and Jasmonate Pathways in  
806 Plant Defense. Plant Cell. 15:165-178.

807

808 Mago, R., Zhang, P., Vautrin, S., Šimková, H., Bansal, U., Luo, M. C., et al. 2015. The  
809 wheat Sr50 gene reveals rich diversity at a cereal disease resistance locus. Nat. Plants.  
810 1:15186.

811

812 Maia, T., Badel, J.L., Marin-Ramirez, G., Rocha, C.M., Fernandes, M.B., da Silva, J.C.F.,  
813 et al. 2017. The *Hemileia vastatrix* effector HvEC-016 suppresses bacterial blight  
814 symptoms in coffee genotypes with the SH1 rust resistance gene. New Phytol. 213:1315-  
815 1329.

816

817 Mandadi, K.K. and Scholthof, K.B.G. 2012. Characterization of a viral synergism in the  
818 monocot *Brachypodium distachyon* reveals distinctly altered host molecular processes  
819 associated with disease. Plant Physiol. 160:1432-1452.

820

821 Miedes, E., Vanholme, R., Boerjan, W., and Molina, A. 2014. The role of the secondary

822 cell wall in plant resistance to pathogens. *Front. Plant Sci.* 5:358.

823

824 Miller, M. E., Zhang, Y., Omidvar, V., Sperschneider, J., Schwessinger, B., Raley, C., et  
825 al. 2018. *De novo* assembly and phasing of dikaryotic genomes from two isolates of  
826 *Puccinia coronata* f. sp. *avenae*, the causal agent of oat crown rust. *mBio* 9:e01650-17.

827

828 Moore, J.W., Herrera-Foessel, S., Lan, C., Schnippenkoetter, W., Ayliffe, M., Huerta-  
829 Espino, J., et al. 2015. A recently evolved hexose transporter variant confers resistance  
830 to multiple pathogens in wheat. *Nat. Genet.* 47:1494-1498.

831

832 Müller, M., and Munné-Bosch, S. 2015. Ethylene response factors: A key regulatory hub  
833 in hormone and stress signaling. *Plant Physiol.* 169:32-41.

834

835 Mur, L.A., Allainguillaume, J., Catalan, P., Hasterok, R., Jenkins, G., Lesniewska, K.,  
836 Thomas, L., and Vogel, J. 2011. Exploiting the *Brachypodium* tool box in cereal and grass  
837 research. *New Phytol.* 191:334–347.

838

839 Mysore, K.S., and Ryu, C.M. 2004. Nonhost resistance: How much do we know? *Trends*  
840 *Plant Sci.* 9:97-104.

841

842 Nazareno, E.S., Li, F., Smith, M., Park, R.F., Kianian, S.F., and Figueroa, M. 2017.  
843 *Puccinia coronata* f. sp. *avenae*: a threat to global oat production. *Mol. Plant Pathol.* DOI:  
844 10.1111/mpp.12608.

845  
846 Nemri, A., Saunders, D.G.O., Anderson, C., Upadhyaya, N.M., Win, J., Lawrence, G.J.,  
847 et al. 2014. The genome sequence and effector complement of the flax rust pathogen  
848 *Melampsora lini*. Front. Plant Sci. 5:98.

849  
850 Nurnberger, T., and Lipka, V. 2005. Non-host resistance in plants: new insights into an  
851 old phenomenon. Mol. Plant Pathol. 6:335-345.

852  
853 Panstruga, R., and Dodds, P.N. 2009. Terrific protein traffic: the mystery of effector  
854 protein delivery by filamentous plant pathogens. Science. 324:748-750.

855  
856 Periyannan, S., Moore, J., Ayliffe, M., Bansal, U., Wang, X., Huang, L., et al. 2013. The  
857 gene *Sr33*, an ortholog of barley *Mla* genes, encodes resistance to wheat stem rust race  
858 Ug99. Science. 341:786-788.

859  
860 Periyannan, S., Milne, R.J., Figueroa, M., Lagudah, E.S. and Dodds, P.N. 2017. An  
861 overview of genetic rust resistance: from broad to specific mechanisms. PLoS Pathog.  
862 13: e1006380.

863  
864 Ravensdale, M., Nemri, A., Thrall, P.H., Ellis J.G., and Dodds, P.N. 2011. Co-evolutionary  
865 interactions between host resistance and pathogen effector genes in flax rust disease.  
866 Mol. Plant Pathol. 12:93-102.

867

- 868 Rutter, W.B., Salcedo, A., Akhunova, A., He, F., Wang, S., Liang, H., et al. 2017.  
869 Divergent and convergent modes of interaction between wheat and *Puccinia graminis* f.  
870 sp. *tritici* isolates revealed by the comparative gene co-expression network and genome  
871 analyses. BMC Genomics. 18:291.
- 872
- 873 Salcedo, A., Rutter, W., Wang, S., Akhunova, A., Bolus, S., Chao, S., et al. 2017.  
874 Variation in the *AvrSr35* gene determines *Sr35* resistance against wheat stem rust race  
875 Ug99. Science. 358:1604-1606.
- 876
- 877 Schulze-Lefert, P., and Panstruga, R. 2011. A molecular evolutionary concept connecting  
878 nonhost resistance, pathogen host range, and pathogen speciation. Trends Plant Sci. 16:  
879 117-125.
- 880
- 881 Sels, J., Mathys, J., De Coninck, B.M.A., Cammue, B.P.A., and De Bolle, M.F.C. 2008.  
882 Plant pathogenesis-related (PR) proteins: A focus on PR peptides. Plant Physiol. Bioch.  
883 46:941-950.
- 884
- 885 Simons, M.D. 1985. Crown rust. In: Roelfs AP, Bushnell WR (eds) The cereal rusts, vol.  
886 II, disease, distribution, epidemiology and control. Academic, New York, USA, pp 131-  
887 172.
- 888
- 889 Stassen, J. H. M., den Boer, E., Vergeer, P. W. J., Andel, A., Ellendorff, U., Pelgrom, K.,  
890 et al. 2013. Specific in planta recognition of two GKLR proteins of the downy mildew

891 *Bremia lactucae* revealed in a large effector screen in lettuce. Mol. Plant. Microbe.  
892 Interact. 26:1259-70.

893

894 Sumit, R., Sahu, B. B., Xu, M., Sandhu, D., and Bhattacharyya, M. K. 2012. Arabidopsis  
895 nonhost resistance gene PSS1 confers immunity against an oomycete and a fungal  
896 pathogen but not a bacterial pathogen that cause diseases in soybean. BMC Plant Biol.  
897 12:1.

898

899 The International *Brachypodium* Initiative. 2010. Genome sequencing and analysis of the  
900 model grass *Brachypodium distachyon*. Nature. 463:763-768.

901

902 Thordal-Christensen, H., Zhang, Z., Wei, Y., and Collinge, D.B. 1997. Subcellular  
903 localization of H<sub>2</sub>O<sub>2</sub> in plants. H<sub>2</sub>O<sub>2</sub> accumulation in papillae and hypersensitive response  
904 during the barley-powdery mildew interaction. Plant J. 11:1187-1194.

905

906 Thordal-Christensen, H. 2003. Fresh insights into processes of nonhost resistance. Curr.  
907 Opin. Plant Biol. 6:351-357.

908

909 Toruno, T.Y., Stergiopoulos, I., and Coaker, G. 2016. Plant-pathogen effectors: Cellular  
910 probes interfering with plant defenses in spatial and temporal manners. Annu. Rev.  
911 Phytopathol. 54:419-441.

912

913



914 Vogel, J.P., Tuna, M., Budak, H., Huo, N., Gu, Y.Q., and Steinwand, M.A. 2009.  
915 Development of SSR markers and analysis of diversity in Turkish populations of  
916 *Brachypodium distachyon*. BMC Plant Biol. 9:88.

917

918 Zipfel, C. 2008. Pattern-recognition receptors in plant innate immunity. Curr. Opin.  
919 Immunol. 20:10-16.

920

921  
 922 **Table 1.** Variation of symptoms in *Brachypodium* accessions infected with *P. coronata* f.  
 923 sp. *avenae* isolates.

| Accessions | 12SD80    |          | 203       |          | 12NC29    |          |
|------------|-----------|----------|-----------|----------|-----------|----------|
|            | Chlorosis | Necrosis | Chlorosis | Necrosis | Chlorosis | Necrosis |
| ABR6       | -         | +        | -         | -        | -         | +        |
| ABR7       | +         | +        | +         | +        | +         | +        |
| Adi12      | +++       | +        | ++        | +        | +         | +        |
| Adi13      | +++       | ++       | +         | +++      | ++++      | ++       |
| Adi15      | ++        | ++       | +++       | +        | +++       | ++       |
| Bd1-1      | +++       | ++++     | +++       | +        | +         | ++       |
| Bd18-1     | -         | +        | +         | +        | +++       | ++       |
| Bd21       | ++        | +++      | +++       | +++      | ++        | ++       |
| Bd21-3     | ++        | +++      | +++       | ++       | ++++      | +++      |
| Bd2-3      | +++       | +++      | +         | ++       | +         | +        |
| Bd29-1     | ++        | ++++     | +         | +        | +         | +++      |
| Bd30-1     | +         | ++       | +         | +        | +         | +++      |
| Bd3-1      | ++        | ++++     | +         | +++      | +++       | ++       |
| BdTR10H    | ++        | ++       | +         | +        | ++        | ++       |
| BdTR13K    | +         | ++       | +         | ++       | +         | ++       |
| Foz1       | +         | +        | +++       | ++++     | +         | -        |
| J6.2       | +         | +        | +         | +        | +         | +        |
| Jer1       | +         | +++      | -         | +        | +         | ++       |
| Koz5       | ++        | ++       | +++       | ++       | +++       | ++       |
| Luc1       | +         | +        | +         | -        | ++        | +        |
| Mon3       | ++        | ++++     | +         | +        | +++       | +        |
| Tek4       | -         | +++      | +         | -        | +         | +        |
| *Bel1      | +         | ++       | +         | +        | +         | ++++     |
| *Bou1      | +         | +        | +         | ++       | -         | +++      |
| *Pob1      | -         | +++      | +         | +        | +         | +        |

924 Accessions with asterisks correspond to *B. hybridum* and those without asterisk are *B.*  
 925 *distachyon* accessions. Symbols “+” and “-” show presence or absence of macroscopic  
 926 symptoms, respectively, and number of “+” indicates symptom severity with ++++ as  
 927 maximum level.

928

929

930 **Table 2.** Histological analysis of H<sub>2</sub>O<sub>2</sub> accumulation in *B. distachyon* accessions ABR6  
 931 and Bd21 and oat lines that contain the *Pc91* and *Pc14* genes in response to *P. coronata*  
 932 f. sp. *avenae* infection.

| Isolates | Plants                        | 2 dpi      | 4 dpi     | 6 dpi      |
|----------|-------------------------------|------------|-----------|------------|
| 12SD80   | ABR6                          | 10.7 ± 1.8 | 8.7 ± 2   | 4.3 ± 1.2  |
|          | Bd21                          | 4 ± 1.5    | 3.3 ± 0.9 | 3.7 ± 1.5  |
|          | * Susceptible oat (Marvelous) | 0          | 0         | 0          |
| 203      | ABR6                          | 0          | 0.3 ± 0.3 | 1.7 ± 0.3  |
|          | Bd21                          | 0          | 0         | 2 ± 0.6    |
|          | * Susceptible oat (Marvelous) | 0          | 0         | 0          |
| 12NC29   | ABR6                          | 0          | 0.7 ± 0.3 | 1 ± 0.6    |
|          | Bd21                          | 0.3 ± 0.3  | 0         | 1 ± 0.6    |
|          | * Susceptible oat (Marvelous) | 0          | 0         | 0          |
| 12SD80   | ** Oat ( <i>Pc91</i> )        | 61.3 ± 7.5 | 65 ± 4.9  | 47.7 ± 4.1 |
|          | * Oat ( <i>Pc14</i> )         | 1 ± 0.6    | 0.3 ± 0.3 | 0.7 ± 0.7  |
| 12NC29   | ** Oat ( <i>Pc91</i> )        | 56 ± 9.5   | 54 ± 6.4  | 49 ± 5.9   |
|          | * Oat ( <i>Pc14</i> )         | 0          | 0.7 ± 0.3 | 0.7 ± 0.3  |

933 Values are calculated as means of three independent experiments, ± indicates standard  
 934 error of the mean. Asterisks \*, \*\* indicate negative and positive experimental controls,  
 935 respectively.

936  
 937  
 938  
 939  
 940  
 941  
 942  
 943  
 944  
 945  
 946  
 947  
 948

949

950

951

952

953

## 954 **Figure legends**

955

956 **Fig. 1.** Infection of oat and *Brachypodium* accessions with *P. coronata* f. sp. *avenae*. **A.**

957 Heat map of virulence phenotypes of *P. coronata* f. sp. *avenae* isolates on oat

958 differentials. **B, C.** Formation of pustules and sporulation on infected susceptible oat

959 leaves (Marvelous), respectively. **D, E.** Variation of infection symptoms and fungal

960 colonization, respectively, on four *Brachypodium* accessions. **F.** Absence (-) or presence

961 (+) of chlorosis and/or necrosis in *Brachypodium* accessions inoculated with *P. coronata*

962 f. sp. *avenae* at 14 dpi. Level of symptom severity is indicated by the number of “+”

963 characters. Symptoms correspond to the representative isolate 12SD80, except for the

964 absence of necrosis which corresponds to isolate 203. Scale bars indicate 2 mm (B, D,

965 F), 0.5 mm (C, top), 0.25 mm (C, bottom) and 0.5 mm (E)

966

967 **Fig. 2.** Colonization of *Brachypodium* accessions by *P. coronata* f. sp. *avenae*. **A.** Fungal

968 growth estimates in foliar tissue for isolates 12SD80, 203, and 12NC29 depicted by the

969 percentage of colonized area at 14 dpi. Crown rust susceptible oat (*A. sativa*) variety

970 Marvelous serves as positive experimental control. Results from two independent

971 experiments for each isolate are shown with distinct color intensities and each bar

972 represents a mean value in one independent experiment (biological replicate). Error bars

973 represent standard error of mean of three leaves (technical replicates) within one

974 independent experiment. **B.** Quantification of fungal DNA for each rust isolate in *B.*  
975 *distachyon* accessions ABR6 (blue line) and Bd21 (orange line). Error bars represent  
976 standard error of mean of four independent experiments (biological replicates).

977

978 **Fig. 3.** Fungal development of *P. coronata* f. sp. *avenae* in *Brachypodium* accessions. **A.**  
979 Illustration of *P. coronata* f. sp. *avenae* development in the plant. Germinated  
980 urediniospores (GS) form a penetration structure appressorium (AP) over a stoma. The  
981 fungus enters the mesophyll cavity and differentiates a substomatal vesicle (SV) and  
982 infection hypha. The establishment of a rust colony (EC) begins with the formation of a  
983 feeding structure (haustorium) which requires differentiation of a haustorial mother cell  
984 (HMC) near the hyphal tip. To undergo HMC formation, the rust fungus must come in  
985 contact with a mesophyll cell. **B.** Bars show the percentage of interaction sites with  
986 germinated urediniospores (GS, light blue), formation of appressorium (AP, orange),  
987 substomatal vesicle (SV, gray), haustorium-mother cell (HMC, yellow), established colony  
988 (EC, dark blue), and EC with sporulation (SP, green) in a sample of 100 infection sites  
989 per independent experiment (biological replicate). Error bars represent standard error of  
990 mean of three independent biological replicates.

991

992 **Fig. 4.** Expression profiling of various defense-related genes in *Brachypodium* accessions  
993 in response to *P. coronata* f. sp. *avenae*. Gene expression (fold-change) relative to mock  
994 inoculations in rust infected ABR6 (blue) and Bd21 (orange) plants of *Aberrant Growth*  
995 *Defects 2* (*AGD2*), *Alternative Oxidase* (*AOX1A*), *Pathogenesis-related* (*PR*) genes,  
996 *Ethylene Response Factor 1* (*ERF1*), *Phenylalanine Ammonia-Lyase* (*PAL*), and

997 *Cinnamyl Alcohol Dehydrogenase (CAD)*. Barplots represent mean values of fold change  
998 per time point. Solid colored bars indicate a fold change value of  $\geq 2$  whereas hatched  
999 bars indicate values below this threshold. Error bars represent standard error of mean of  
1000 of three independent experiments (biological replicates). Asterisks indicate statistically  
1001 significant differences ( $p \leq 0.05$ ) between ABR6 and Bd21 accessions as determined by  
1002 a *t*-test.

1003  
1004 **Fig. 5.** Expression profiling of *BdSTP13* in *Brachypodium* accessions in response to *P.*  
1005 *coronata* f. sp. *avenae*. Gene expression (fold-change) relative to mock inoculations in  
1006 rust infected ABR6 (blue) and Bd21 (orange) plants of the putative hexose transporter  
1007 *BdSTP13*. Solid colored bars indicate a fold change value of  $\geq 2$  whereas hatched bars  
1008 indicate values below this threshold. Error bars represent standard error of mean of three  
1009 independent experiments (biological replicates) Asterisks indicate statistical significant  
1010 differences ( $p \leq 0.05$ ) between ABR6 and Bd21 accessions as determined by a *t*-test.

1011  
1012 **Supplementary files**

1013  
1014 **Supplementary Fig. 1** shows development of *P. coronata* f. sp. *avenae* in all  
1015 *Brachypodium* accessions and susceptible oat Marvelous as quantified by percentage of  
1016 germination, formation of appressorium and occurrence of plant penetration. Error bars  
1017 represent standard error of mean of two independent experiments (biological replicates).  
1018 Data was collected for 50 infection sites per independent biological replicate.

1019

1020 **Supplementary Fig. 2** shows colonization of *Brachypodium* accessions by *P. coronata*  
1021 f. sp. *avenae*. Fungal growth estimate per isolate, with individual isolates 12SD80, 203  
1022 and 12NC29 shown as a percentage value relative to the accession displaying the highest  
1023 level of colonization for each isolate.

1024  
1025 **Supplementary Fig. 3** shows examples of H<sub>2</sub>O<sub>2</sub> detection at 2 dpi using DAB staining.  
1026 Images depict urediniospores and presence of H<sub>2</sub>O<sub>2</sub> is shown by a white arrow. **A, B, C.**  
1027 *B. distachyon* accession ABR6 inoculated with rust isolates 12SD80, 203, and 12NC29,  
1028 respectively. **D, E.** Oat differential line that contains the resistance gene *Pc91* inoculated  
1029 with isolates 12SD80 and 12NC29, respectively. The gene *Pc91* is effective against both  
1030 isolates and therefore serves as positive experimental control. **F, G.** Oat differential line  
1031 that contains the resistance gene *Pc14* inoculated with isolates 12SD80 and 12NC29,  
1032 respectively. The gene *Pc14* is not effective against any of the isolate and therefore  
1033 serves as negative experimental control. **H, I.** Susceptible oat variety Marvelous  
1034 inoculated with isolates 12SD80 and 12NC29, respectively. **J.** Lack of H<sub>2</sub>O<sub>2</sub> in mock  
1035 inoculated oat Marvelous (negative control). Scale bars indicate 100 μm.

1036  
1037 **Supplementary Fig. 4** shows evaluation of *GAPDH*, *Ubi4* and *Ubi18* as potential  
1038 reference genes for data normalization in targeted gene expression analyses via qRT-  
1039 PCR. **A.** Amplification efficiency of primers for *GAPDH*, *Ubi4* and *Ubi18* genes. **B.**  
1040 Comparison of expression levels of *GAPDH*, *Ubi4*, and *Ubi18* genes between mock and  
1041 pathogen-infected tissues after combining Cq values from both *B. distachyon* accessions  
1042 (ABR6 and Bd21) and all time points (12, 24, 48, and 72 hpi). Boxplots show variation

1043 between mean Cq values and whiskers on boxplots show variability outside the upper  
1044 and lower quartiles. Data was collected from three independent experiments each  
1045 including three technical replications. **C.** Comparison of expression levels of *GAPDH* in  
1046 ABR6 and Bd21 in both mock and infected samples across time points. Graph shows  
1047 mean values and error bars on dotplots represent standard error of mean of three  
1048 independent experiments (biological replicates).

1049  
1050 **Supplementary Fig. 5** shows expression profiling of various defense-related genes in *B.*  
1051 *distachyon* accessions in response to *P. coronata* f. sp. *avenae*. Gene expression (fold-  
1052 change) relative to mock inoculations in rust infected ABR6 (blue) and Bd21 (orange)  
1053 plants of *Aminocyclopropane-1-carboxylic Acid Oxidase (ACO1)*, *Lipoxygenase 2*  
1054 (*LOX2*), *12-oxophytodienoate Reductase 3 (OPR3)*, *WRKY18* transcription factor, and  
1055 *callose synthase*. Barplots represent mean values of fold change per time point. Solid  
1056 colored bars indicate a fold change value of  $\geq 2$  whereas hatched bars indicate values  
1057 below this threshold. Error bars represent standard error of mean of three independent  
1058 experiments (biological replicates). Asterisks indicate statistical significant differences ( $p$   
1059  $\leq 0.05$ ) between ABR6 and Bd21 accessions as determined by a *t*-test.

1060

1061

1062

1063

1064

1065



1066 **Supplementary Table 1.** List of gene-specific primers used for RT-qPCR analysis.

| Gene           | Gene ID      | Function                 | Primer (5'-3')                                                         |
|----------------|--------------|--------------------------|------------------------------------------------------------------------|
| <b>*AGD2</b>   | Bradi3g49447 | SA signaling             | Forward: GTACCCAGAAGCGAAGGTCATC<br>Reverse: TAGCCTTGGTAGCCTTCAGGAG     |
| <b>**AOX1A</b> | Bradi5g20547 | SA signaling             | Forward: ACTACGCCTCGGACATCCATTAC<br>Reverse: AGGCATCGACCGTCCATTTGAG    |
| <b>**PR1</b>   | Bradi1g57580 | SA signaling             | Forward: AGCTCTGGCATCATCAGCATCC<br>Reverse: CGTTGTGTGGGTCCAGGAAATC     |
| <b>**PR5</b>   | Bradi1g13060 | SA signaling             | Forward: CCGACCGATTACTCCAGGTTCTTC<br>Reverse: TAATTAGCTCGCTCGCTCGCTTG  |
| <b>**ERF1</b>  | Bradi3g50490 | ET signaling             | Forward: TGGTGCCGTGTGAAATTTGTCG<br>Reverse: CAGATTTTCGCTGCACCACTTGC    |
| <b>*ACO1</b>   | Bradi1g75960 | ET signaling             | Forward: CATATTCCATCAGGGGAGAAGC<br>Reverse: CTTCCACTGCCATACTCAGCAC     |
| <b>**LOX2</b>  | Bradi3g07010 | JA signaling             | Forward: GCGGCGTTTCGAGAAGTTCAATG<br>Reverse: GTCCTGGTTATTGTTTCGCTCGTC  |
| <b>**OPR3</b>  | Bradi1g05870 | JA signaling             | Forward: ACCCATTTCTTCTCGAATGATCCC<br>Reverse: ACACGTGCAAGTACGGAAAGAAAG |
| <b>*PAL</b>    | Bradi3g49260 | JA signaling             | Forward: ATTCAGGCTATCCTTGCTGAGG<br>Reverse: AGGAGCTTCCTTCCAAGATGTG     |
| <b>*WRKY18</b> | Bradi4g30360 | Transcription factor     | Forward: GCTTAGAGACGACGGCACTTAC<br>Reverse: TTGATACCCATCCTTCACAACG     |
| <b>CAD</b>     | Bradi3g22980 | Lignin biosynthesis      | Forward: GGTACTGTCACCAAGGGAGG<br>Reverse: GTGACCCAATCCCCCAAGTC         |
| <b>CS</b>      | Bradi2g46250 | Callose biosynthesis     | Forward: GGGAGCTTGCTACAATGGGT<br>Reverse: TCACCACCACTTGTGTGCTT         |
| <b>BdSTP13</b> | Bradi1g69710 | Putative sugar transport | Forward: ATCTTCAATGGCGCTGCAC<br>Reverse: GAAGAGGATGCCGATGGTGA          |
| <b>GAPDH</b>   | Bradi3g14120 | Reference gene           | Forward: TTGCTCTCCAGAGCGATGAC<br>Reverse: CTCCACGACATAATCGGCAC         |

1067 \*,\*\* Primer sequences were reported by Gill et al. (2015) and Mandadi and Scholthof  
 1068 (2012), respectively. Those that are not marked with asterisks were designed in our study.  
 1069 *Callose synthase* is abbreviated as *CS*.

1070

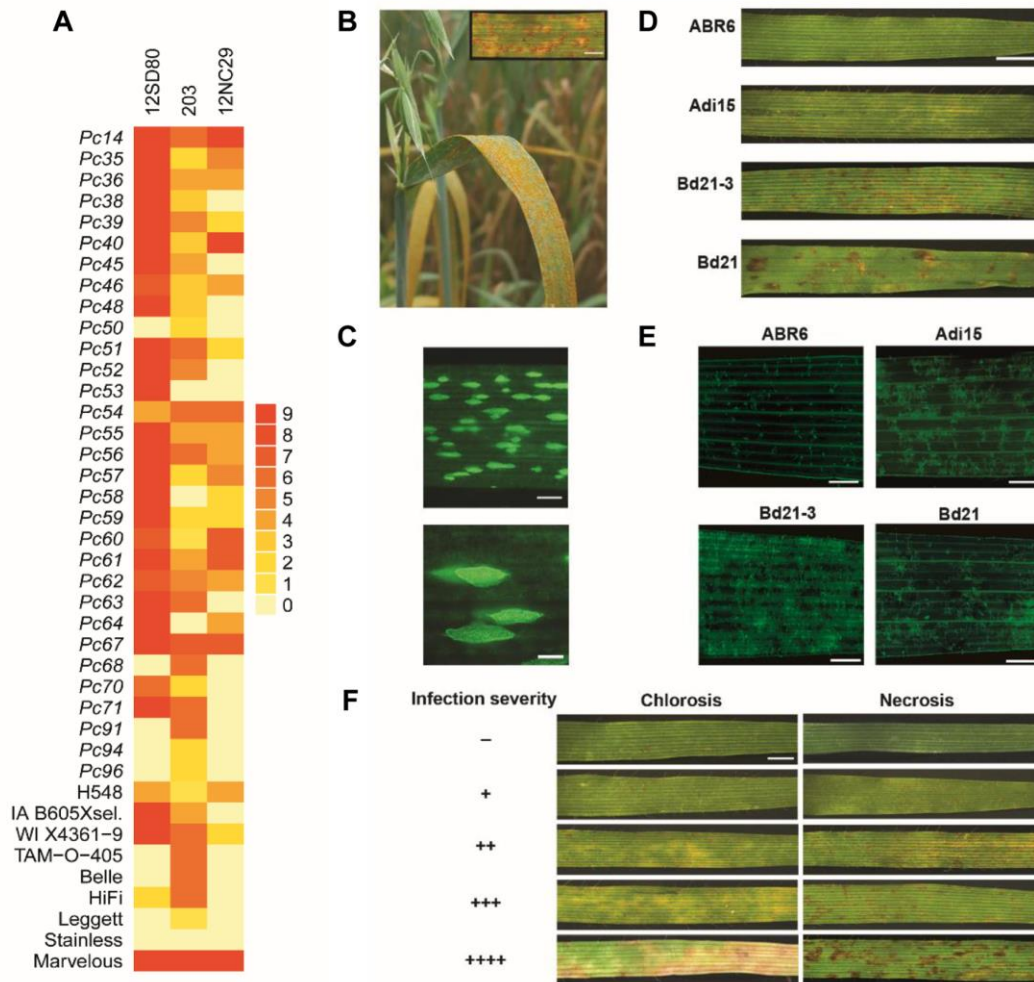

**Fig. 1**

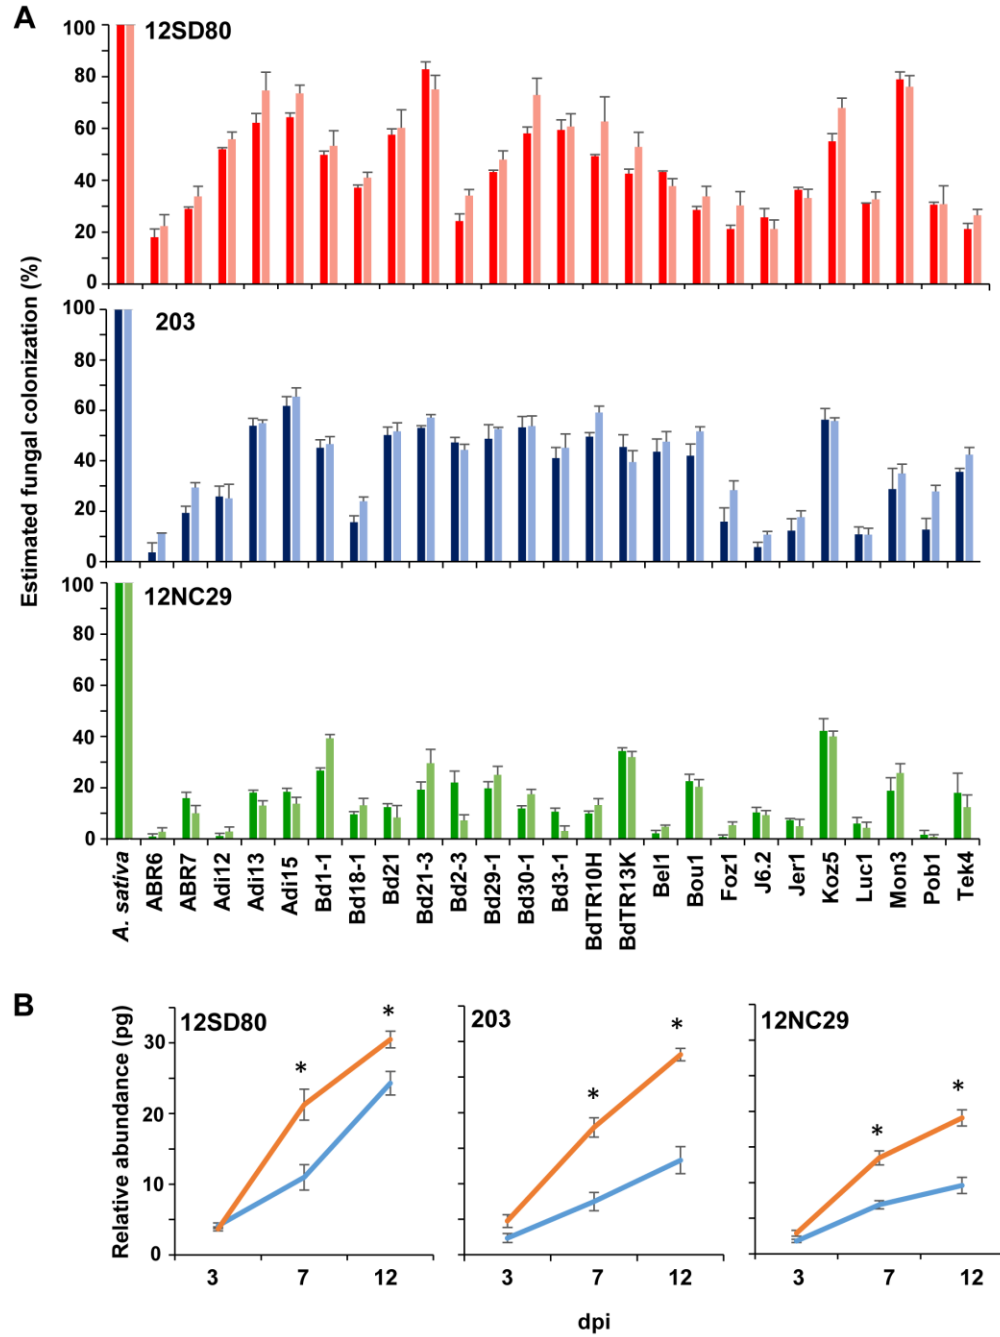

**Fig. 2**

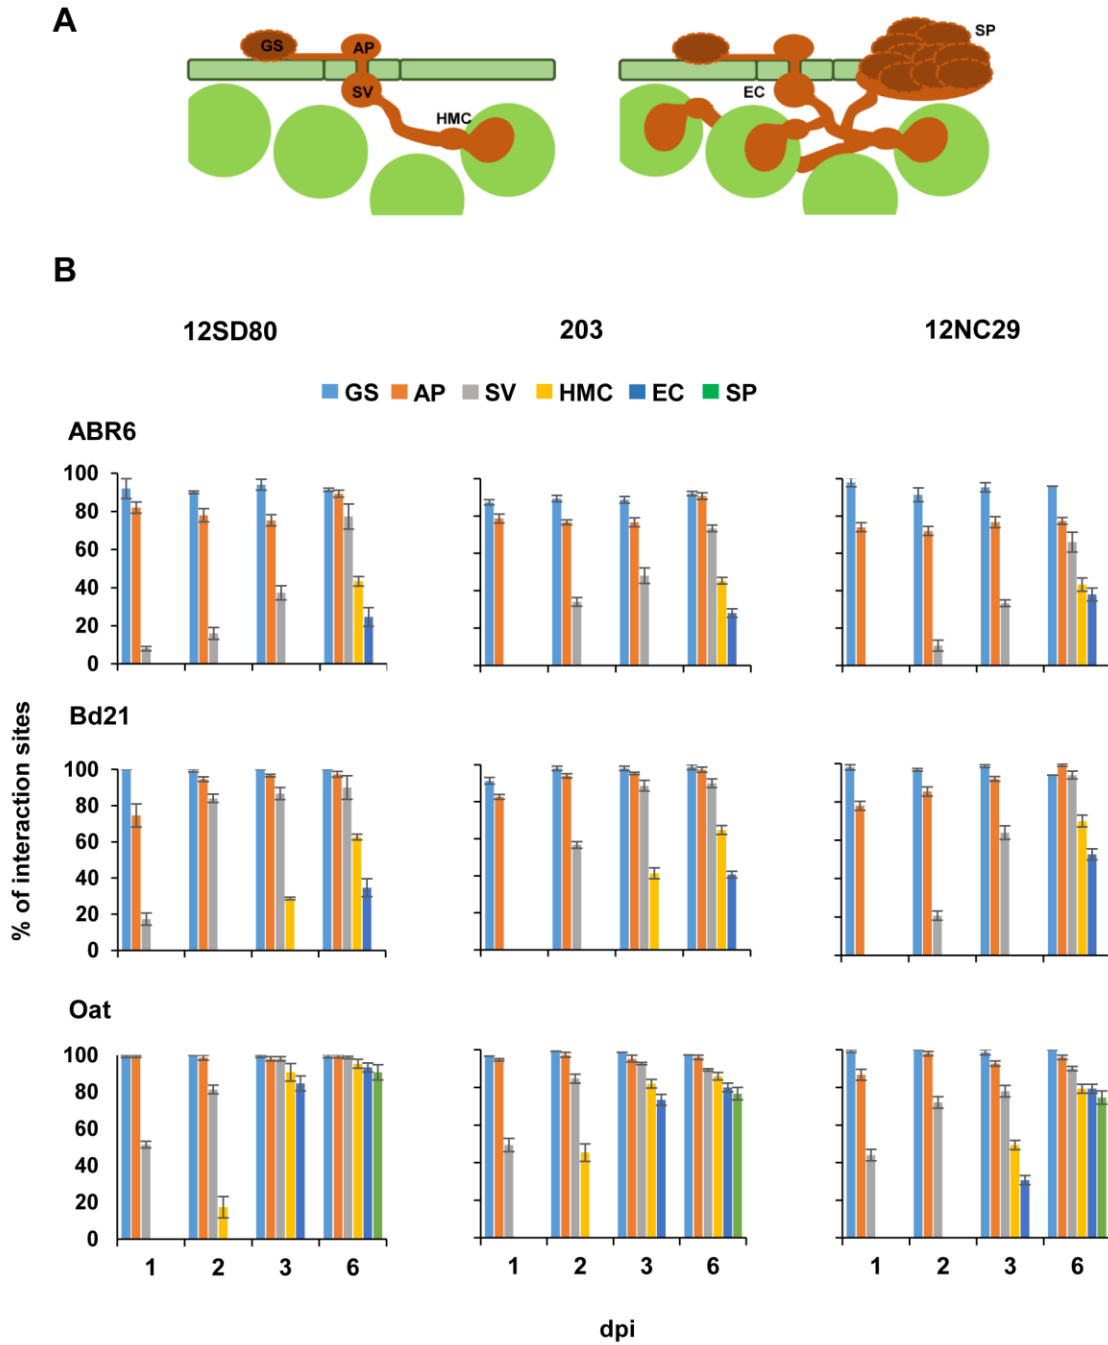

**Fig. 3**

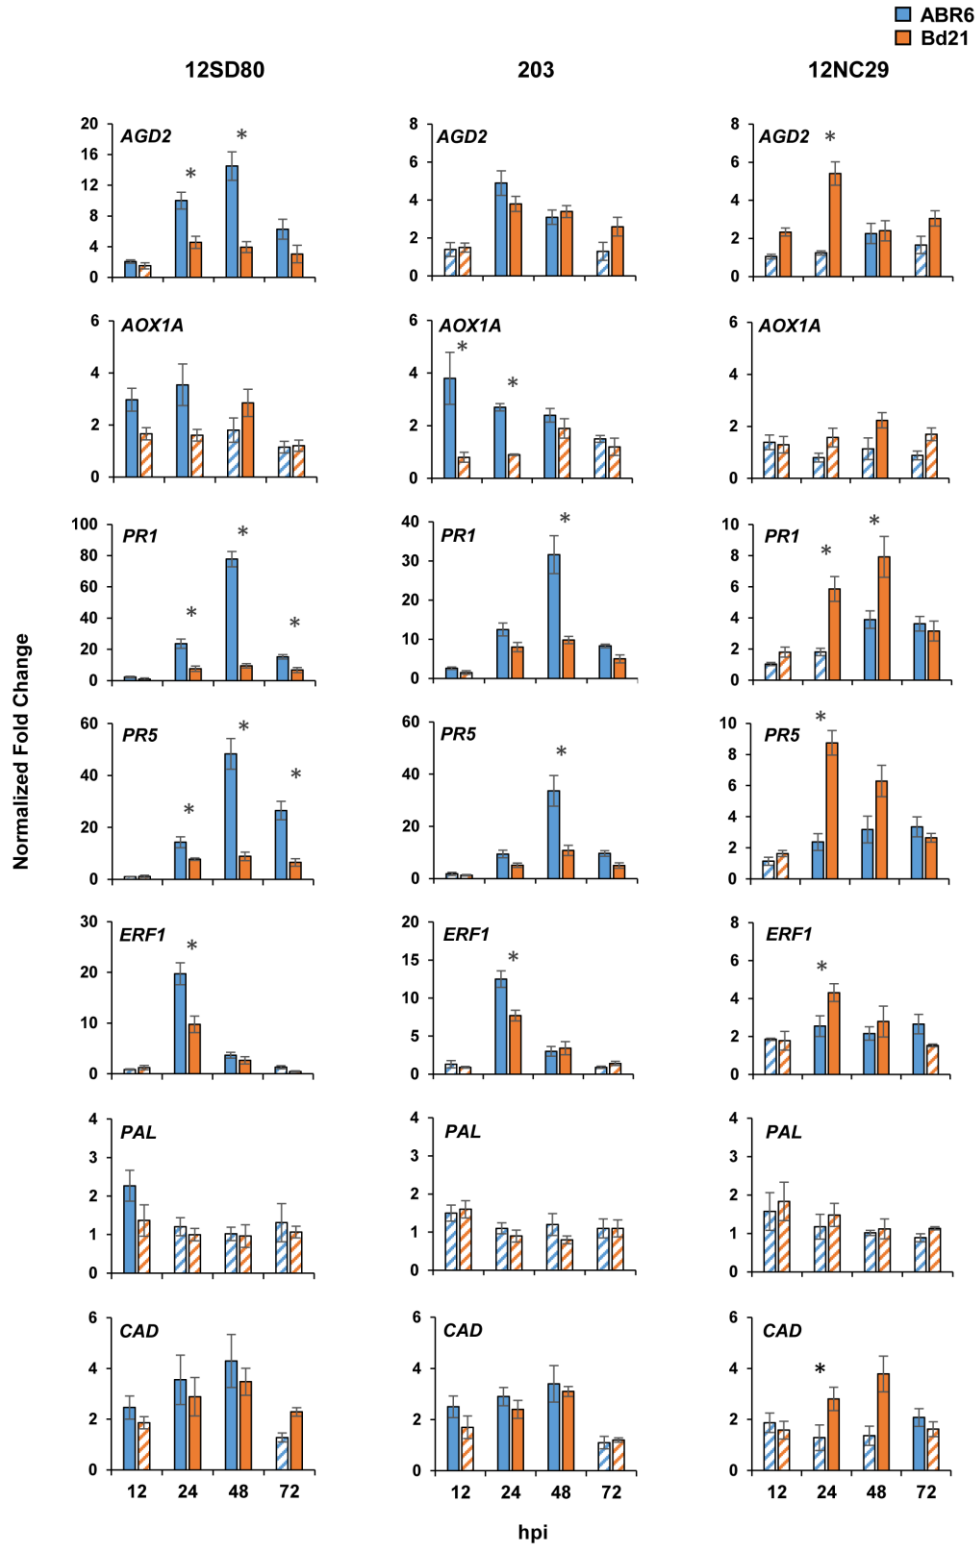

Fig. 4

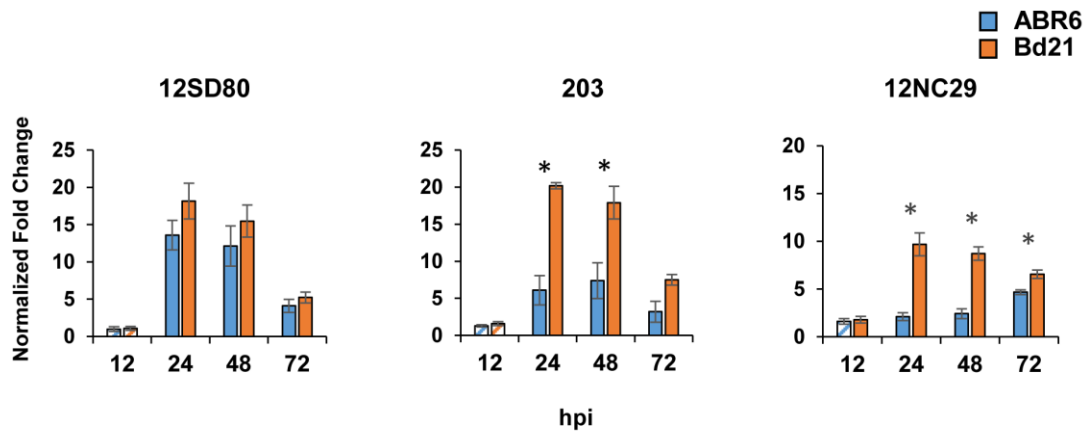

Fig. 5

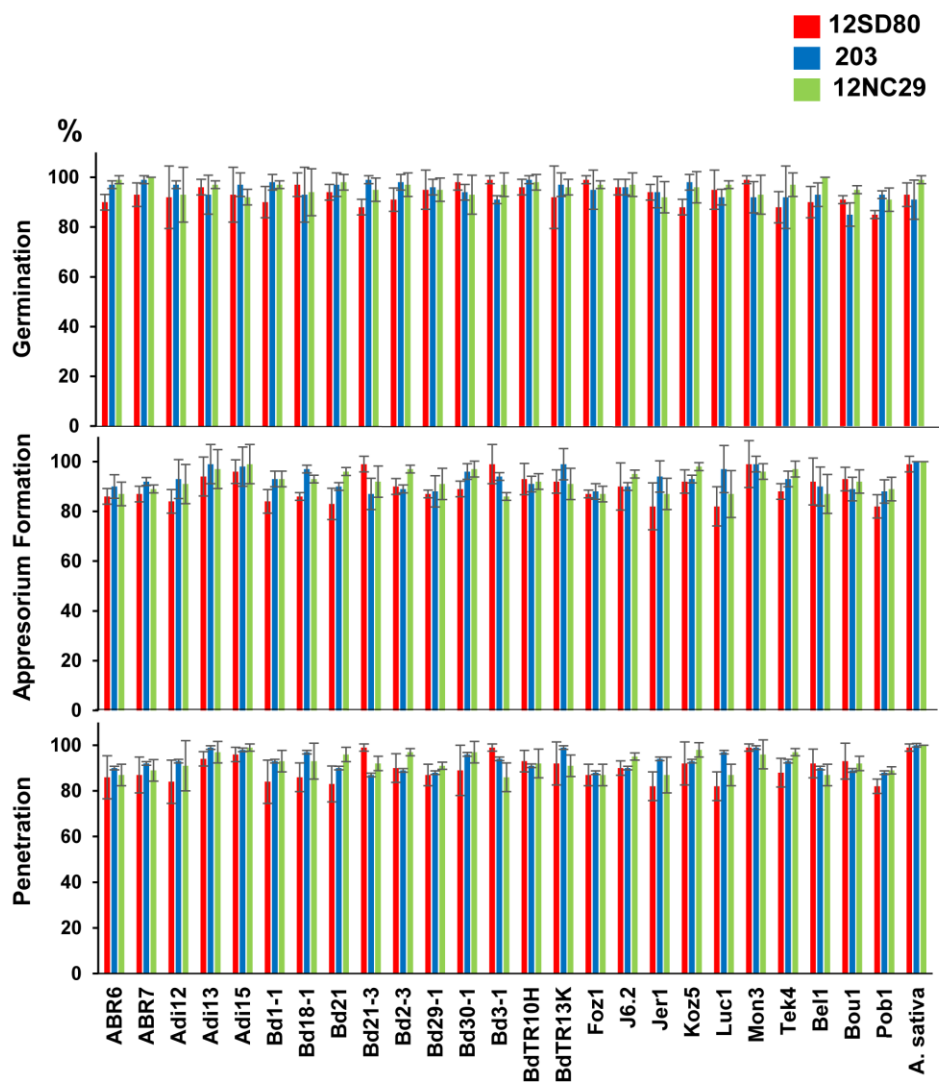

Supplementary Fig. 1

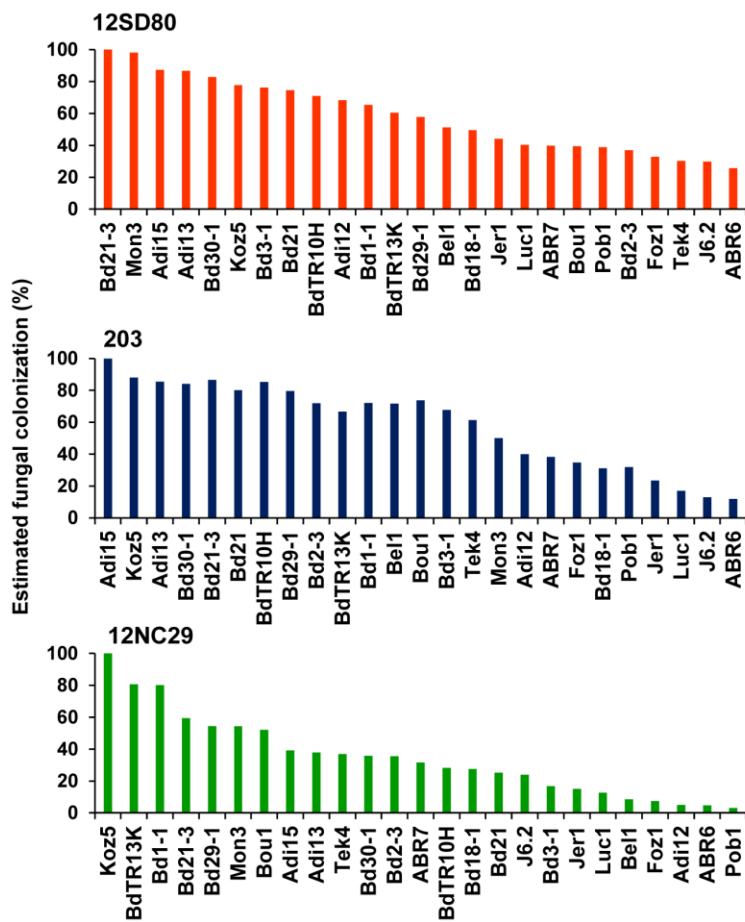

Supplementary Fig. 2



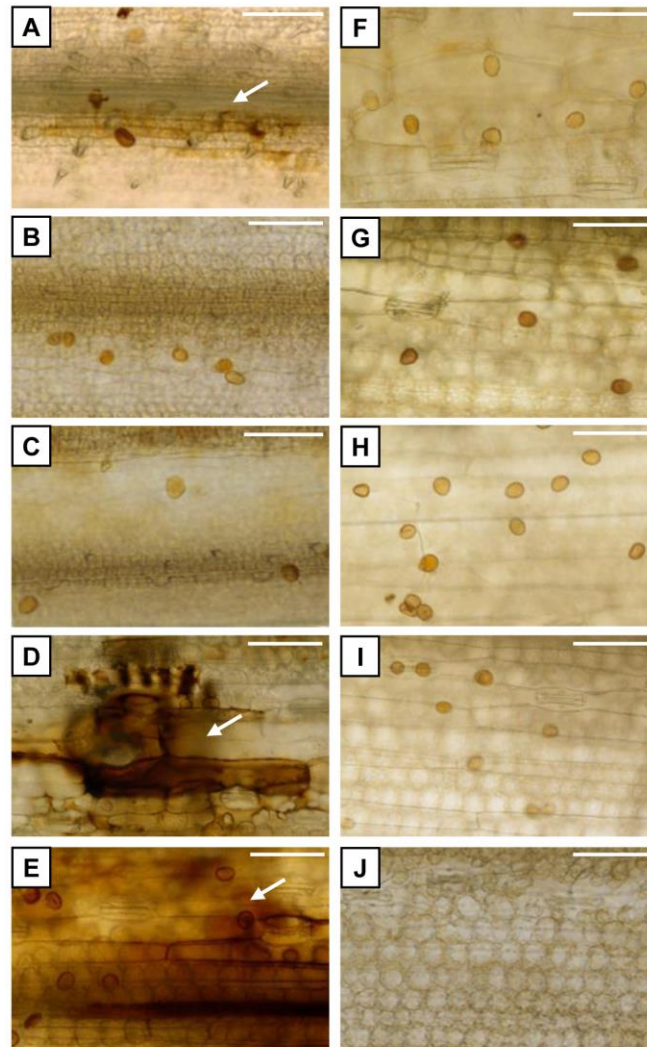

**Supplementary Fig. 3**

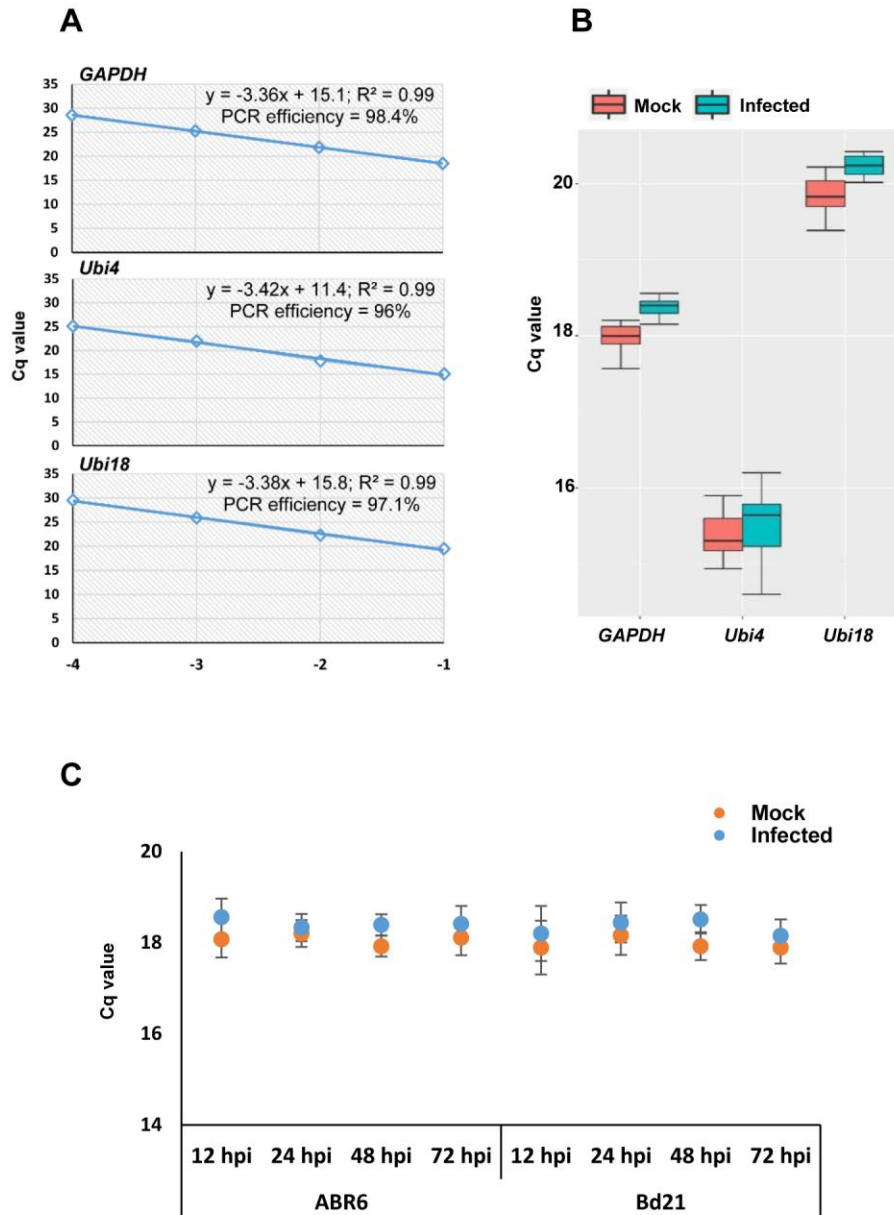

Supplementary Fig. 4

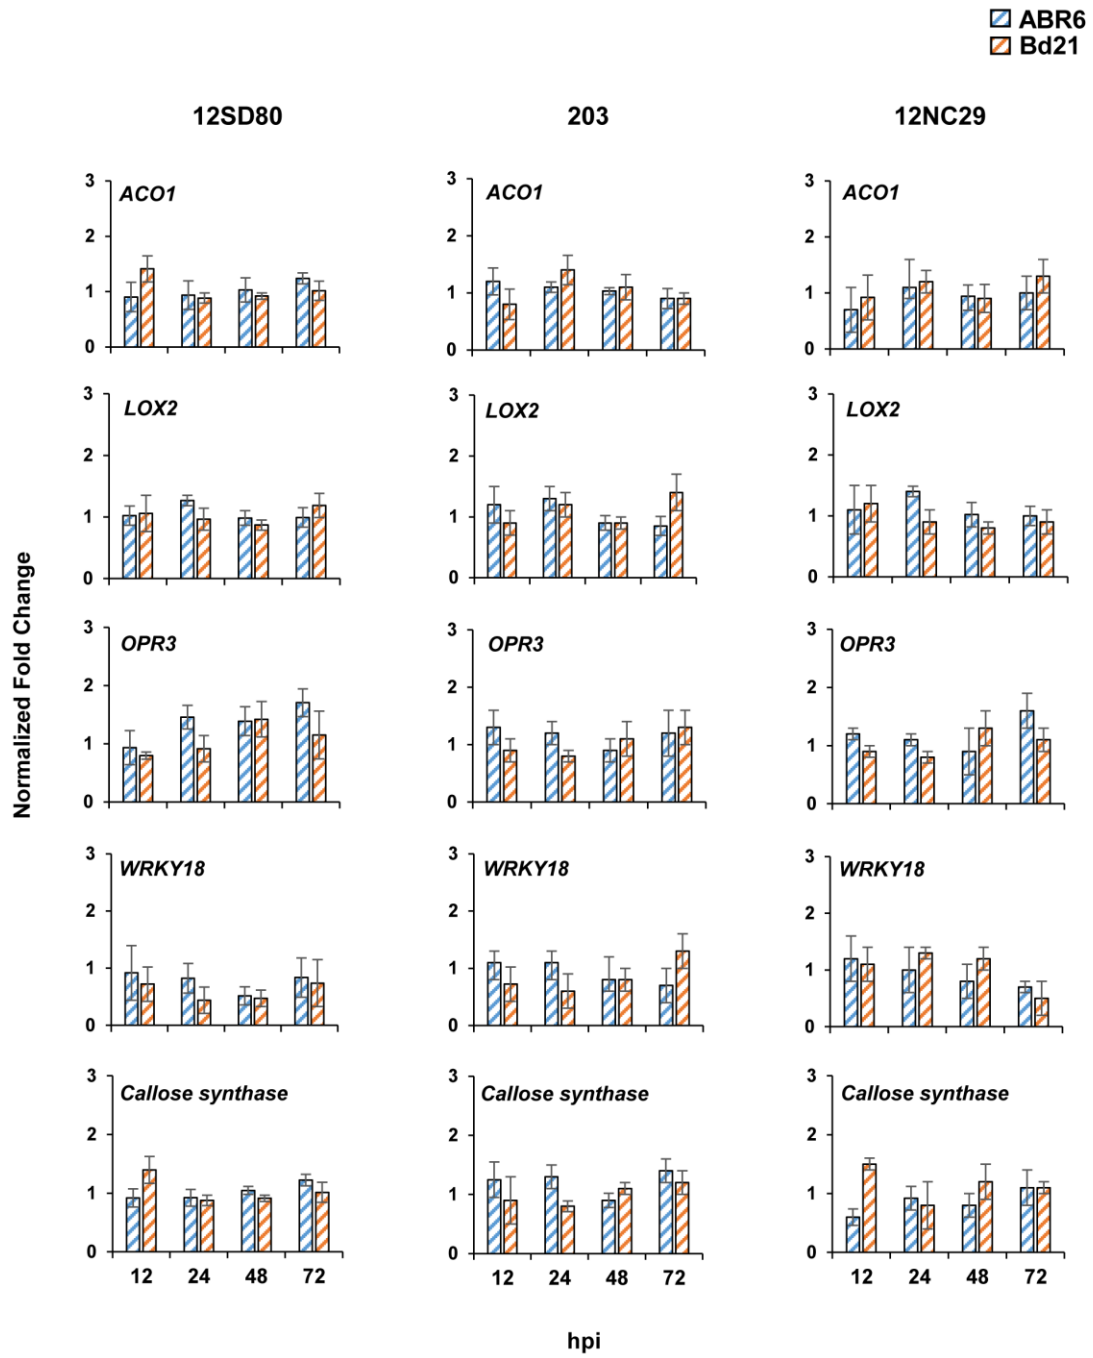

Supplementary Fig. 5
